# Supplementary material for: The eco-conscious wind turbine: bringing societal value to design
Source: Copernicus journal article supplement (doi:10.5194/wes-2022-37), 2022-06-07
Supplement: Supplementary file [file wes-2022-37-AC1-supplement.pdf]

## REVISION TO MANUSCRIPT DRAFT

### Wind Energy Science Discussion

#### The eco-conscious wind turbine: bringing societal value to design

The authors would like to thank the two reviewers for their time and for the useful feedback. All inputs that they provided have contributed to the improvement of the paper.

A list of point-by-point replies to the reviewers' comments is reported in the following.

We have taken the opportunity to make several small editorial changes to the text, in order to improve readability. A revised version of the manuscript is attached to the present reply, with additions highlighted in blue and deletions marked in red.

The authors

#### Reviewer #1

---

*[Reviewer] This is a great paper that certainly deserves publication in WES. I'd like to congratulate the authors for their hard work and I only have a couple minor comments to further improve their article.*

#### Numbered comments

1. *[Reviewer] Section 2.1: there are several more LCOE+ metrics in literature than the ones that you report here. I miss why you chose LVOE and NVOE opposed to others, for example PLCOE, which is recommended by Mai et al, 2021.*

**[Authors]** The goal of this paper is to emphasize the mirroring between an economic and environmental perspective and define eco-conscious metrics to quantify the environmental impact and benefits brought by a wind turbine, which can be applied to guide an optimization exercise. Even though we are aware that there are multiple LCOE+ metrics in the literature, we chose to focus on LVOE and NVOE because these metrics are defined similarly to the classic and very well-known LCOE figure, and rely only on the concepts of cost and value, which are also the main focus of this paper. Clearly further research should focus on further extending the list of eco-conscious metrics. We have added a paragraph at the beginning of Section 2 to emphasize the existence of other metrics, citing three relevant references from the recent literature.

2. *[Reviewer] Sections 3.2 and 3.4 should be expanded. I understand that you are scaling masses and costs solely from rotor diameter and hub height. Your inputs must also include fixed quantities such as rated power and max tip speed (?), which help estimate gearbox and generator torque. A couple extra sentences would help. Also, to show the validity of the assumptions, you should report masses and costs for the baseline WT and show that the absolute values match reasonably well with literature, for example with turbine capital cost numbers provided in <https://www.nrel.gov/docs/fy22osti/81209.pdf>*

**[Authors]** The mass model is based on the NREL Cost and Scaling Model 2017, which estimates the mass of the different wind turbine components based on hub height, rated power and rotor diameter, as illustrated in Fig. 1. The gearbox mass is estimated based on the maximum generator torque, which is computed considering a fixed maximum tip speed of 80 m/s. The cost model

estimates the different cost items based on the masses of the different components. Figure 1 shows the dependency of the cost of the different components with respect to the inputs.

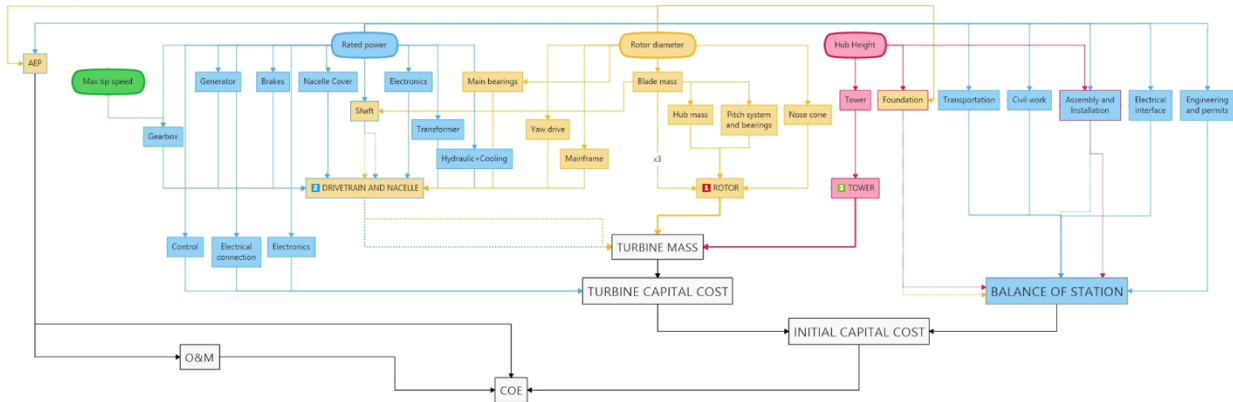

**Figure 1.** Visualization of the dependency of masses and costs with different inputs of the mass and cost model.

The mass model validation has been performed in comparison to several documents from the recent literature. The blade mass of the baseline considered for this study and described in Sect. 4.1 has a rotor diameter of 115.7 m and a mass of 12.72 tons, which is comparable to the 16 tons of the IEA Task 37 130m land-based rotor<sup>1</sup>. The tower of this baseline turbine presents a mass of 190 tons, which matches well the mass of towers under 100 m described in the report *Increasing Wind Turbine Tower Heights: Opportunities and Challenges*<sup>2</sup>. The cost model is validated against the values indicated in Stehly et. al<sup>3</sup>, WindGuard<sup>4</sup> and Duffy et al.<sup>5</sup>. The costs of the baseline show a good agreement with the costs of similar projects in Germany, as indicated by WindGuard. The slightly higher turbine capital (TCC) expenditures result from differences in the assumptions, with WindGuard considering also transportation and installation costs within TCC. Stehly et al. also shows similar costs with respect to the baseline. Slightly higher operating expenses are found for the baseline and WindGuard values, since Germany presents higher average operating expenses than the US for the years of the study, as shown in Duffy et al.

**Table 1.** Overview of the mass and costs of the baseline, and similar reference turbines used in WindGuard & Stehly et al.

| Baseline         |          | WindGuard     | Stehly et al.            |
|------------------|----------|---------------|--------------------------|
| Rated power [MW] | 3        | 2 to 3        | 2.32                     |
| Diameter [m]     | 115.7    |               | 113                      |
| Hub height [m]   | 92       | Less than 100 | 86                       |
|                  | Mass [t] | Cost [€/kW]   | Cost [€/kW] <sup>6</sup> |

<sup>1</sup> Bortolotti et al. NREL/TP-5000-73492

<sup>2</sup> Lantz E. et al.: *Increasing Wind Turbine Tower Heights: Opportunities and Challenges*. NREL Report/TP-5000-73629, May 2019

<sup>3</sup> Stehly T. et al.: *2017 Cost of Wind Energy Review*. NREL Report/TP-5000-73629, May 2019

<sup>4</sup> DeutscheWindGuard: *Wissenschaftlicher Bericht. Vorbereitung und Begleitung bei der Erstellung eines Erfahrungsbericht gemäß §97 Erneuerbare-Energien-Gesetz. Teilvorhaben II e): Wind an Land*

<sup>5</sup> Duffy et al.: *Land-based wind energy cost trends in Germany, Denmark, Ireland, Norway, Sweden and the United States*, <https://doi.org/10.1016/j.apenergy.2020.114777>

<sup>6</sup> Considering a dollar/euro conversion ratio of 1.15.

|                                     |            |        |      |     |
|-------------------------------------|------------|--------|------|-----|
| <b>Rotor</b>                        | 7.7361e+04 | 274    |      | 276 |
| <b>DT+Nacelle</b>                   | 1.1929e+05 | 400    |      | 469 |
| <b>Tower</b>                        | 1.9065e+05 | 192.33 |      | 206 |
| <b>Turbine Capital Expenditures</b> |            | 866.33 | 1000 | 951 |
| <b>BOS</b>                          |            | 343    | 331  | 313 |
| <b>Operating expenditures</b>       |            | 53.6   | 52   | 38  |

We have now added a paragraph in Sect. 4.1., describing the key cost items of the baseline wind turbine and how they compare with values sourced from the literature.

3. **[Reviewer]** Page 12, line 322: “A representative scenario of 50% incineration and 50% landfilling is assumed here, as described in Vestas (2011, 2013a, b).” This is surprising to me, I thought that the vast majority of blades ended up in landfills. I looked at some references, for example <https://doi.org/10.1016/j.rser.2021.111847> and <https://doi.org/10.1177/1048291116676098>, and I struggle to find hard numbers. Probably, percentages change from country to country. This said, the references that you provide also don’t seem very solid. Some extra literature and possibly a couple more sentences are recommended to support your assumption.

**[Authors]** End of life treatment is very dependent on the specific location of the turbine and the legislation of the country. Different authors take different assumptions for the treatment of the blades, for instance Haapala (US, 2014) and Taskin (Turkey, 2013) consider that they are landfilled, Bang et al. (US, 2019) assume that glass fibers are 100% incinerated, and Meunier (France, 2009) assumes that 98% of the blades are recycled.

According to WindEurope<sup>8</sup>, landfill is essentially not used anymore in some European countries (i.e. Germany, Austria, Belgium and Denmark), and composite materials waste is banned altogether from landfills in Germany and in the Netherlands<sup>7</sup>. On the other hand, there are currently no landfill bans in any of the US states for composite waste and wind turbine blades. We updated the scenario considered in this study to better adhere to the German legislation, which bans the landfilling of composites. The actual end of life of blades in Germany is complex, as options beyond landfilling, recycling or incineration are possible; for instance, wind turbine blades are often used in cement co-processing<sup>8</sup>. However, for simplicity and due to the lack of representative data, a scenario of 100% incineration is now considered in the revised paper.

4. **[Reviewer]** Figure 9: why is the y axis so tiny? I cannot interpret this plot: I do not see the drop in price with wind speed and I don’t understand what the red markers represent (is it a box-whisker plot?). The caption doesn’t help me much either.

**[Authors]** The plot shows the data for price and grid GHG distributed in bins. The format chosen is a box plot, where the central mark indicates the median, and the bottom and top edges of the box indicate the 25<sup>th</sup> and 75<sup>th</sup> percentiles, respectively. The whiskers extend to the most extreme data points not considered as outliers, whereas outliers are plotted individually using the red ‘+’ symbol. We have updated the caption to more precisely describe the boxplots. Additionally, we

<sup>7</sup> Beauson et al. <https://doi.org/10.1016/j.rser.2021.111847>

<sup>8</sup> WindEurope <https://windeurope.org/wp-content/uploads/files/about-wind/reports/WindEurope-Accelerating-wind-turbine-blade-circularity.pdf>

have updated the plot and added a line that follows the mean value of each boxplot and is extrapolated all the way to cut-out speed.

## Reviewer #2

---

**[Reviewer]** *The manuscript of Canet et al. on "The eco-conscious wind turbine: bringing societal value to design" is a timely and important contribution that shows a way forward how to quantify and trade the value of wind energy beyond the economical cost of energy. This way it can facilitate discussions beyond speculation and preconceived notions.*

### Numbered comments

1. **[Reviewer]** *There are key insights in the work that may be stressed even more clearly by the authors in the abstract and conclusions than they already do:*

- *similar as in economic metrics, like LCoE, one needs to look at the difference between value and costs (and not costs alone), here it is that wind energy also displaces CO<sub>2</sub> production by an order of magnitude more than it produces.*

- *"value-based metrics are location- and time-dependent quantities", so here the merit order in the electricity market needs to be accounted for to quantify the CO<sub>2</sub> displacement effect.*

- *There are likely trades possible at little economic costs, or even none, that benefit society at large if quantified and traded in design, e.g. via multi-disciplinary design analysis and optimization (MDAO).*

**[Authors]** Thank you for your comments, we have added a final paragraph in the conclusion to emphasize the key messages of the paper.

2. **[Reviewer]** *The authors are very much aware of the limitations of their study, but here a few points to consider, although these likely make their conclusions rather stronger:*

- *In their MDAO, rating of the turbines was kept constant. This is reasonable at first, but when a larger rotor was found to be beneficial for societal impact, some economic penalty (compared to a pure LCoE optimization) had to be paid. However, for this larger rotor, a larger rating may then pay off for LCoE.*

**[Author]** We agree that it might be interesting to analyze the impact of changing the rating. We have updated the conclusions to clearly state the need for further studies in this direction.

3. **[Reviewer]**- *Often their optimization led to an optimum design at boundaries, e.g. the lowest specific power allowed. Besides the question what bounds to choose, here, allowing for a variable rating could also help.*

**[Author]** The bounds were defined to stay within the validity range of the cost model. Clearly, further studies beyond these boundaries with more realistic mass and cost models should be performed. We updated the conclusions section to highlight this important point.

**[Reviewer]**- *Sensitivity analysis and uncertainty quantification will be important for (future) robust designs using their methodology.*

**[Authors]** We agree with the need to further develop this work from a probabilistic point of view. We have updated the conclusion section to emphasize this point.

**[Reviewer]** - *The authors found the "environmental net value at the two locations (...) very similar". Is this due to being in the same electricity market with the same merit order?*

**[Authors]** We believe this is the case. Future studies should analyze the effects brought by different electricity markets. We updated the conclusion section to highlight this point.

**[Reviewer]** *Overall, I consider this well-written and well-structured manuscript a significant contribution to the literature and are looking forward to follow up work by the authors, our research community and beyond!*

Thank you for your comment.

# The eco-conscious wind turbine: bringing societal value to design

Helena Canet, Adrien Guilloré, and Carlo L. Bottasso

Wind Energy Institute, Technical University of Munich, 85748 Garching bei München, Germany

**Correspondence:** Carlo L. Bottasso (carlo.bottasso@tum.de)

## Abstract.

Wind turbines are designed to minimize the cost of energy, a metric aimed at making wind competitive with other energy-producing technologies. However, now that wind energy is competitive, how can we increase its value for society? And how much would a societal gain cost other stakeholders, such as investors or consumers? This paper tries to answer these questions from the perspective of wind turbine design.

Although wind turbines produce green renewable energy, they also generate various impacts on the environment, as all human endeavours. Among all impacts, the present work adopts the environmental effects produced by a turbine over its entire life cycle, expressed in terms of CO<sub>2</sub>-equivalent emissions. A new approach to design is proposed, whereby Pareto fronts of solutions are computed to define optimal trade-offs between economic and environmental goals.

The new proposed methodology is demonstrated on the redesign of a baseline 3 MW wind turbine at two locations in Germany, differing for typical wind speeds but within the same energy market. Among other results, it is found that, in these conditions, a 1% increase in the cost of energy can buy about a 5% decrease in the environmental impact of the turbine. Additionally, it is also observed that in the specific case of Germany, very low specific-power designs are typically favored, because they produce more energy at low wind speeds, where both the economic and environmental values of wind are higher. Furthermore, it is found that the CO<sub>2</sub>-equivalent emissions displaced by a wind turbine are one order of magnitude larger than the produced emissions.

Although limited to the sole optimization of wind-generating assets at two different locations, these results suggest the existence of new opportunities for the future development of wind energy where, by shifting the focus slightly away from a purely cost-driven short-term perspective, longer-term benefits for the environment (and, in turn, for society) may be obtained.

## 20 1 Introduction

The levelized cost of energy (LCOE) is defined as the net-present cost of an energy-producing technology over its lifetime per MWh supplied. LCOE is the metric that has been traditionally used to evaluate the competitiveness of energy sources. In recent years, the LCOE from wind (and from the sun) has experienced a dramatic decrease (Roser, 2021), which in turn has fueled an astonishing growth of wind energy and great expectations for its further expansion (Veers et al., 2019). About a decade ago, the International Energy Agency (IEA) Wind Task 26, which focuses on the cost of wind energy, identified a key driver for the future development of wind technology: the ability of generating cost parity – without direct policy support –

with conventional sources, in a broad range of conditions and locations (Lantz et al., 2012). This indeed has largely happened and the evolution of wind energy technology continues at a fast pace, to the point that even offshore wind is rapidly marching towards subsidy-free competitiveness (Jansen et al., 2020). The decrease in LCOE from wind has been partially driven by  
30 technological advancements, which have led to more reliable turbines characterized by higher hub heights and larger rotor diameters and, most importantly, much improved capacity factors. Additionally, economies of scale, increased competitiveness and an improved maturity of the sector have also contributed to the fall of LCOE witnessed in recent years (IRENA, 2021).

LCOE, however, paints only a partial view of a situation that is much more complex and articulated than what appears through cost alone (Joskow, 2011). A more holistic picture of the overall effects of renewable energies in general, and of wind  
35 in particular, can only be obtained when looking beyond cost metrics. Indeed, the urgency created by climate change, energy security and independence could not be clearer, as stressed by the headline news coming from all over the world every day.

In fact, the future participation of wind power in the energy market and, more broadly, its societal role will not only be shaped by its relative competitiveness, but also by its *value* (Beiter et al., 2021). The word *value* is generally understood in the literature as a synonym for *economic value*, which is a measure of the benefit provided to an actor by some good or service.  
40 In reality, in the case of an energy-generating technology, the concept of value is extremely broad. Leaving aside aspects such as energy security and independence, which are of crucial importance but also beyond the scope of the present analysis, it is worth noticing that the value of an energy technology cannot be quantified per se, because it depends on the interactions of that technology with the system in which it operates (Mai et al., 2021). For instance, the total system-value of an asset can be seen as the sum of different system-value components – including energy value, capacity value, ancillary service value and others  
45 (Mai et al., 2021). Additionally, due to supply and demand variability, the market price of electricity can vary widely, with high wholesale prices during peak demand times, which however can reach down to even negative values when large amounts of renewable energy are available in the grid. This fact, in addition to transmission and storage constraints, makes the economic value of electricity time- and location-specific (Hirth, 2012).

The importance of value has not gone unnoticed to the recent literature, and a range of options for increasing the economic  
50 value of wind energy have been explored. For instance, the geographic location of wind plants – and, more in general, of variable renewable energy plants – and the diversification of the energy mix are two strategies that can be used to this effect (Hirth and Mueller, 2016). Additionally, even the design characteristics of wind-generating assets (which is the focus of the present work) can change when considering value, rather than simply cost. In fact, some wind turbine design parameters – in particular hub height and specific power (i.e. rated power divided by rotor swept area) – can have a significant effect on  
55 economic value, as shown by Hirth and Mueller (2016); Lantz et al. (2017); Swisher et al. (2022), among others.

Economic cost and value, however, are actor-centric metrics, which mostly capture the investor point of view and, in turn, also the price eventually paid by the end consumer. Additionally, cost and value are short-term metrics: cost evolves rapidly from year to year, whereas value changes on even much faster time scales of minutes/hours. In this sense, economic cost and value – if used alone – seem to be rather myopic metrics for the design of a wind turbine. Indeed, time is ripe for looking  
60 beyond the benefit of the single actor and beyond short-term effects: wind energy should evolve to also take into account also its broad and long-term impacts at the societal level. It is a major ambition of this paper to bring this new point of view to the

design of wind turbines. Clearly, the same philosophy can also be applied to the design of wind plants and, more in general, to the design of the whole energy system.

From this broader perspective, the overarching goal of design becomes the alignment of short-term economic needs with long-term sustainable development goals. In fact, while it is necessary to enhance the economic value of wind energy to increase its competitiveness today, it is also our moral duty to improve the value of this technology for society now and into the future.

How can these broader goals be achieved? What are the new metrics that should be used to capture long-term societal effects? How can value be defined beyond its current economic meaning? How different would new more eco-conscious turbines be from standard LCOE-driven designs? And how much would a societal-level gain cost in terms of LCOE? These are some of the questions that are in need of answers, and that the present paper is trying to address, albeit in a preliminary and certainly yet somehow incomplete form.

There are undoubtedly several different options for including long-term societal effects in the design of wind turbines. This study focuses on the impact exerted by wind technology on the environment in terms of greenhouse gas (GHG) emissions. While GHG emissions clearly do not capture all effects of wind energy, they do provide for a major and quantifiable impact with long-term consequences. As long as they are quantifiable through some appropriate metric, other impacts could be included in a future even more general approach than the one presented here.

At first glance, it might seem unusual to speak about GHG emissions in the context of wind energy. After all, a wind turbine is an eco-friendly machine by definition, which captures kinetic energy from wind to produce electricity without directly releasing pollutants into the environment. Additionally, the deployment of each new wind turbine displaces a certain amount of GHG emissions, because the output of other more polluting energy sources can be correspondingly reduced. However, even wind turbines do have an environmental cost – as indeed all human activities –, and non-negligible amounts of GHGs are emitted throughout the different stages of their life. For example, the production of the large amount of steel needed required for the tower, or the extraction of raw materials – such as the rare-earth elements present in the generator –, do have significant environmental impacts; additionally, the end-of-life (EOL) treatments of components with limited recyclability, such as blades largely made of reinforced thermoset polymers, do release polluting emissions into the atmosphere. More in general, all stages of the life-cycle of a turbine, from the extraction of raw materials all the way to the eventual disposal/recycling/repurposing of its components, generate impacts that can be quantified in terms of CO<sub>2</sub>-equivalent emissions. Given its importance, it is no surprise that the evaluation of the environmental cost of wind turbines is the subject of various recent studies, including [Al-Behadili and El-Osta \(2015\)](#); [Ozoemena et al. \(2018\)](#); [Al-Behadili and El-Osta \(2015\)](#) and [Ozoemena et al. \(2018\)](#), among others. In addition to representing a meaningful metric per se, GHG emissions can also be turned into economic costs by using the societal cost of carbon (SCC), which is an estimate of the net present value of monetized social damages occurring from the emission of an additional metric ton of CO<sub>2</sub> ([Gillingham and Stock, 2018](#); [National Academies of Sciences, Engineering and Medicine \(National Academies of Sciences, Engineering and Medicine, 2017\)](#); [Gillingham and Stock, 2018](#)). However, care should be exercised when using SCC, as it can take a large range of values, depending on the underlying assumptions and models (IPCC, 2007; Ricke et al., 2018; Kikstra et al., 2021).



While several publications propose metrics that capture the economic profitability of a wind turbine (Ueckerdt et al., 2013; Simpson et al., 2020; Mai et al., 2021), no metrics are yet available to describe the environmental cost and value of wind energy. To address this gap, this work introduces novel eco-conscious metrics that mirror existing economic ones. These metrics are then used within a multi-objective design framework, which sizes some macroscopic parameters of a wind turbine (here rotor diameter and hub height) to find optimal trade-offs between economic and environmental perspectives.

The eco-conscious metrics are defined based on a life-cycle assessment (LCA) method, which has the added benefit of breaking down the contribution to the overall GHG emissions of a wind turbine by its components, materials and ~~technological choices~~ life-cycle stages. This way, a ranking of the most harmful aspects of a design is readily obtained, revealing new opportunities and highlighting the most promising pathways for further mitigating GHG emissions beyond what is possible by sizing alone (Guilloré et al., 2022).

The paper is organized as follows. Section 2 defines metrics that quantitatively measure the cost and value of a wind-generating asset, both from the economic and the environmental perspectives. Next, Sect. 3 describes the methods that were used here to estimate the design metrics. In addition to standard energy production, mass, and cost models, this section describes and validates an LCA model ~~whose goal is to estimate~~ that estimates the CO<sub>2</sub>-equivalent emissions produced during each stage of the life and by each component of a wind turbine. The design approach is ~~also~~ formulated in this same section, in terms of single- and multi-objective constrained optimization problems. The new proposed methodology is exercised in Sect. 4, by redesigning a baseline 3 MW wind turbine at two different locations in Germany, one in the north and the other in the south of the country, characterized by different wind resources but within the same electricity market. The results are analyzed by looking at the trade-offs between economic and environmental metrics, and at the change in the design characteristics of the optimal turbines with respect to a standard LCOE-driven baseline. Finally, Sect. 5 summarizes the main findings of this study and offers an outlook towards future work.

## 2 Design metrics from economic and environmental perspectives

This section describes metrics for the preliminary design of an energy-generating unit using three common concepts: cost, value, and net value. In general, *cost* indicates the expense incurred for making a product or service, whereas *value* is a measure of the benefit brought by that good or service. The difference between cost and value is termed *net value*. In the present context, the good or service is the production of energy. The three terms cost, value and net value will be used with two different connotations: *economic*, when relating to money, and *environmental*, when relating to the GHGs emitted in the lifetime of an asset. These metrics are applicable to both single generating units (e.g., a wind turbine) or a plant (e.g., a wind farm), although the present work focuses only on the former case. For metrics not based on cost, value or net value, the reader is referred to Ueckerdt et al. (2013); Simpson et al. (2020) and Mai et al. (2021).

## 2.1 Economic perspective

The economic perspective results from an actor-centric point of view, e.g. the investor or the consumer, where the focus is primarily driven by short-term economic forces, such as revenue or out-of-pocket expenditure.

### 130 2.1.1 Levelized Cost of Energy (LCOE)

LCOE is an estimate of the average net-present cost of each unit of energy produced over the lifetime of a generating asset. As such, this metric is widely used to assess the competitiveness of different energy technologies. LCOE is formally defined as the ratio of the discounted lifetime costs with and the discounted generated energy (Aldersey-Williams and Rubert, 2019; Duffy et al., 2020), i.e.

$$135 \quad \text{LCOE} \left[ \frac{\text{€}}{\text{MWh}} \right] = \frac{\text{Economic costs}}{\text{Energy production}} = \frac{\sum_{y=1}^Y \frac{C_y^{\text{CAPEX}} + C_y^{\text{OPEX}}}{(1+d)^y}}{\sum_{y=1}^Y \frac{E_y}{(1+d)^y}}, \quad (1)$$

where the subscript  $(\cdot)_y$  indicates the  $y$ -th year and  $Y$  is the lifetime in years, while  $C^{\text{CAPEX}}$  are the capital costs,  $C^{\text{OPEX}}$  are the operating and maintenance costs,  $E$  is the asset-generated energy, and finally  $d$  is the discount rate.

Capital costs include all expenditures incurred to manufacture the asset, while the operating and maintenance costs include all expenditures necessary for running the asset and maintaining it in working conditions (Joskow, 2011; Mai et al., 2021).

140 The discount rate is the interest rate used to determine the present value of future cash flows and, therefore, expresses the time value of money. The discount rate is often affected by significant uncertainties, which in turn may impact LCOE.

### 2.1.2 Levelized Value of Energy (LVOE)

LVOE is an estimate of the average net-present economic value of each unit of energy produced over the lifetime of a generating asset (Mai et al., 2021). Similarly to LCOE, LVOE is defined as

$$145 \quad \text{LVOE} \left[ \frac{\text{€}}{\text{MWh}} \right] = \frac{\text{Economic value}}{\text{Energy production}} = \frac{\sum_{y=1}^Y \frac{V_y}{(1+d)^y}}{\sum_{y=1}^Y \frac{E_y}{(1+d)^y}}. \quad (2)$$

The total revenue  $V_y$  generated by the asset in the  $y$ -th year is computed as a function of time  $t$  as

$$V_y = \int_{t=0}^{T_y} p(t)P(t) dt, \quad (3)$$

where  $T_y$  is the year duration,  $p(t)$  is the spot market price in €/MWh, and  $P(t)$  is the power produced by the unit at time instant  $t$ . Alternatively, the same quantity can be estimated as a function of wind speed  $U$  as

$$150 \quad V_y = T_y \int_{U_i}^{U_o} p_y(U)P(U)W_y(U) dU, \quad (4)$$

where  $U_i$  and  $U_o$  are respectively the cut-in and cut-out wind speeds,  $P(U)$  is the turbine power curve, while  $p_y(U)$  and  $W_y(U)$  are respectively the spot market price of energy and the Weibull probability density function at the site where the asset is installed in the year  $y$ .

### 2.1.3 Net Value of Energy (NVOE)

155 NVOE is defined as the difference between LVOE and LCOE (Mai et al., 2021), i.e.

$$\text{NVOE} \left[ \frac{\text{€}}{\text{MWh}} \right] = \frac{\text{Economic value} - \text{Economic cost}}{\text{Energy production}} = \text{LVOE} - \text{LCOE}. \quad (5)$$

## 2.2 Environmental perspective

The environmental perspective results from a societal point of view, in which the goal is no longer to achieve the cheapest energy in the short term, but rather the most sustainable one in the long term. The metrics presented here mirror the ones  
 160 defined in the previous section. However, instead of considering the economic perspective, these novel metrics focus on the environmental impact ~~and are~~, which is quantified in terms of CO<sub>2</sub>-equivalent emissions.

As money is attributed a time value through the discount rate, even impacts could in principle be discounted, because emissions produced/displaced today might have a different effect from the ones of tomorrow. Indeed, time horizons are included in the estimation of the Global Warming Potential (GWP) that is used to convert the effects of different gases into equivalent  
 165 CO<sub>2</sub> climate impacts (IPCC, 2007). However, discount rates for CO<sub>2</sub>-equivalent emissions are at present not available, and would probably be subjected to high uncertainties; therefore, discount rates were not considered in the definition of ~~the~~ these environmental-based metrics.

### 2.2.1 Impact of Energy (IOE)

IOE represents an estimate of the average environmental cost of each unit of energy produced over the lifetime of a generating  
 170 asset:

$$\text{IOE} \left[ \frac{\text{kg CO}_2\text{eq}}{\text{MWh}} \right] = \frac{\text{Environmental cost}}{\text{Energy production}} = \frac{\sum_{m=1}^M Q_m}{\sum_{y=1}^Y E_y}, \quad (6)$$

where  $Q_m$  is the CO<sub>2</sub>-equivalent GHG emissions during life-life-cycle stage  $m$ , and  $M$  is the total number of life-life-cycle stages of the asset, from the extraction of the raw materials all the way to EOL treatments. IOE is the environmental counterpart of LCOE, with the difference that decommissioning and EOL costs are generally not considered in the definition of the latter.

175 Similar definitions of IOE have been given elsewhere using different names, as for example Carbon Footprint CO<sub>2</sub> Intensity (Hauschild et al., 2018) (Tremeac and Meunier, 2009), *Emission Factor* (Koffi et al., 2017), CO<sub>2</sub> Intensity Carbon Footprint (Tremeac and Meunier, 2009) (Hauschild et al., 2018), and *Global Warming Potential* (Ozoemena et al., 2018).

### 2.2.2 Environmental Value of Energy (EVOE)

EVOE is the counterpart of LVOE, and it is defined as the average environmental value per unit of energy generated by an asset over its lifetime:

$$\text{EVOE} \left[ \frac{\text{kg CO}_2\text{eq}}{\text{MWh}} \right] = \frac{\text{Environmental value}}{\text{Energy production}} = \frac{\sum_{y=1}^Y V_y^{\text{env}}}{\sum_{y=1}^Y E_y}. \quad (7)$$

The environmental value is quantified here in terms of the CO<sub>2</sub>-equivalent emissions that are displaced in the grid by the energy-producing asset. At time  $t$ , the energy mix is characterized by  $G_t$  generating technologies, each producing a certain power  $P_g(t)$ . The activation of a renewable generating unit that produces a power output  $P(t)$  displaces some output  $P_g^{\text{dis}}(t)$  of the  $g$ -th generating technology, such that  $P(t) = \sum_{g=1}^{G_t} P_g^{\text{dis}}(t)$ . Despite the activation of a renewable generating unit, the time-dependent total power in the grid remains the same, as it is driven by demand. As a consequence, an environmental value  $V_y^{\text{env}}$  is generated over the time duration  $T_y$ , which is equal to the amount of displaced emissions, i.e.

$$V_y^{\text{env}} = \int_{t=0}^{T_y} \sum_{g=1}^{G_t} f_g(t) P_g^{\text{dis}}(t) dt. \quad (8)$$

The emission factor  $f_g$  quantifies the environmental impact of each generating technology in the mix. This quantity depends on time, because it is related to the operational conditions of the generating technology. For instance, operating a fossil-fueled plant at partial load has an efficiency penalty that increases the fuel consumption and the GHG emissions per unit of generated energy (Silver-Evans et al., 2012; Thomson et al., 2017). For simplicity, here each given technology  $g$  is associated with an average time-independent emission factor defined as

$$f_g = \frac{Q_g}{E_g}, \quad (9)$$

where  $Q_g$  indicates the average CO<sub>2</sub>-equivalent GHG emissions caused by the production of an amount of energy  $E_g$ .

The actual displacement of grid emissions is a complex time-dependent phenomenon (Hawkes, 2010; Thomson et al., 2017; Boeing et al., 2019). In fact, the only emissions that will be displaced are the ones of generators operating on the margin, i.e. the last generators needed to meet demand at a given time that are capable of rapidly adapting their power generation in response to a change in demand (Silver-Evans et al., 2012; Seckinger, 2021). Therefore, the actual displacement of grid emissions is determined by these marginal generators, which in turn depend on time-variable factors such as power demand, resource availability (e.g., wind speed and solar irradiation), or availability of other generation technologies. For simplicity, here it is assumed that all generating technologies are displaced equally, i.e.  $P_g^{\text{dis}}(t)/P_g(t) = P(t)/\sum_{g=1}^{G_t} P_g(t)$ , for each generating technology  $g$  at each time  $t$ . This is a conservative approach that is generally used to estimate emission displacements, and which has been shown to underestimate the real displacement potential of wind energy (Hawkes, 2010; Silver-Evans et al., 2012; Thomson et al., 2017). Under this hypothesis, the environmental value writes

$$V_y^{\text{env}} = \int_{t=0}^{T_y} \frac{\sum_{g=1}^{G_t} f_g P_g(t)}{\sum_{g=1}^{G_t} P_g(t)} P(t) dt = \int_{t=0}^{T_y} f_{\text{grid}}(t) P(t) dt. \quad (10)$$

The expression on the right hand side of the equation considers the whole grid as one aggregated generating unit, characterized by one equivalent time-dependent system-average emission factor  $f_{\text{grid}}(t)$ , which reflects the composition of the energy mix at each time instant (Thomson et al., 2017; Seckinger, 2021).

210 As for economic value  $V_y$ , also environmental value  $V_y^{\text{env}}$  can be estimated as a function of wind speed, instead of time, by the following expression

$$V_y^{\text{env}} = T_y \int_{U_i}^{U_o} f_{\text{grid}}(U) P(U) W_y(U) dU. \quad (11)$$

### 2.2.3 Net Environmental Value of Energy (NEVOE)

NEVOE is the counterpart of the economic metric NVOE, and it is defined as the difference between the environmental value  
215 of energy and the impact of energy, i.e.

$$\text{NEVOE} \left[ \frac{\text{kg CO}_2\text{eq}}{\text{MWh}} \right] = \frac{\text{Environmental value} - \text{Environmental cost}}{\text{Energy production}} = \text{EVOE} - \text{IOE}. \quad (12)$$

### 2.2.4 Future economic Societal Savings (FSS)

FSS estimates the future societal savings enabled by the displacement of GHG emissions, and writes

$$\text{FSS} \left[ \frac{\text{€}}{\text{MWh}} \right] = \text{SCC} \cdot \text{NEVOE}. \quad (13)$$

220 The societal cost of carbon (SCC) is the present discounted monetary value of the future damage caused to the environment by one metric ton increase in CO<sub>2</sub>-equivalent emissions (National Academies of Sciences, Engineering and Medicine, 2017). The quantification of SCC is clearly not a straightforward task. Indeed, the literature reports a large range of values (Ricke et al., 2018; Kikstra et al., 2021), mostly due to different assumptions on climate sensitivity, economic and non-economic impacts, and response lags, among others (IPCC, 2007). Additionally, NEVOE depends on EVOE that, as previously argued, is based  
225 on the simplifying assumption that all generation technologies are equally displaced by wind power; since this is hardly exactly true in practice, further uncertainties are introduced in the estimation of FSS.

## 3 Methods

This section describes the eco-conscious design of wind turbines, formulated as a constrained multi-objective optimization problem based on a number of interconnected underlying models. Figure 1 shows a schematic representation of the workflow  
230 and of its main components.

### 3.1 Energy model

The energy  $E_y$  produced by a wind turbine at a specific location in the year  $y$  is computed as

$$E_y = f_a f_p f_w T_y \int_{U_i}^{U_o} P(U) W_y(U) dU. \quad (14)$$

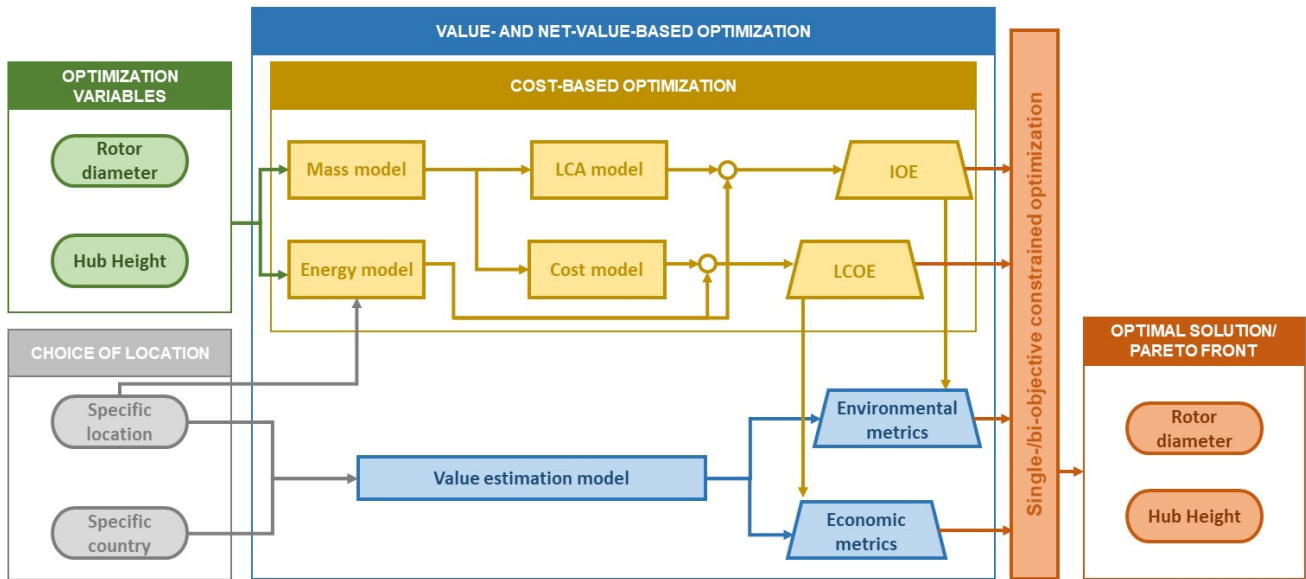

**Figure 1.** Schematic illustration of the workflow for the eco-conscious multi-objective design optimization of wind turbines. Rounded squares represent variables, squares are models and trapezoids are merit functions.

Three correction coefficients are included in the formula. The availability factor  $f_a$  accounts for failures, maintenance, and curtailment time, and it is set to the typical value of 0.98 (Vestas, 2011, 2013a, b; Pfaffel et al., 2017). The performance factor  $f_p$  considers different sources of losses due to turbulence, gusts, wakes, blade soiling/erosion, etc., and is set to the value of 0.65, which is the lower limit of the range indicated in Lantz et al. (2017). The wind factor  $f_w$  accounts for possible deviations of the wind resource from the Weibull distribution, for example due to yearly variability (Lantz et al., 2017). Since the present analysis is based on actual historical data, which already includes any variability of the resource,  $f_w$  is set to the value of one.

### 240 3.2 Mass model

The mass estimation model is composed of three sub-models. The mass of the various turbine components is based on the 2017 NREL mass model (NREL, 2021), which is an updated version of the 2006 cost and scaling model (Fingersh et al., 2006). The inputs of the mass model are rated power, hub height and rotor diameter. The gearbox mass is estimated based on the maximum generator torque, which was computed assuming a fixed maximum tip speed of  $80 \text{ ms}^{-1}$ . Based on the mass of the single components, a material breakdown model defines a bill of materials. This model is based on information sourced from several references (Rydh et al., 2004; Vestas, 2011, 2013a, b; Demir and Taskin, 2013; Haapala and Prempreeda, 2014; Ozoemena et al., 2018), and includes 15 different material types: glass fiber, carbon fiber, epoxy resin, sandwich foam, alloyed steel, unalloyed steel, galvanized steel, copper, aluminium, PVC and other plastics, rubber, paint and coating, Neodymium permanent magnet (NdFeB), electronics, and concrete. Finally, a waste factor model estimates the quantity of material that is

250 wasted during the different stages of the component lifetime. Waste factors for fiberglass, epoxy resin, foam, rubber, paint and coating are modeled according to Bortolotti et al. (2019), while a factor of 5% is considered for the other materials.

The use of mass and scaling models is one of the various approximations of the present approach. More precise estimates of masses and bills of materials would clearly be possible by using detailed sizing procedures (Bortolotti et al., 2016; NREL, 2021). This level of complication and computational cost was however not deemed necessary for capturing general trends, 255 which is the main goal here.

### 3.3 LCA model

LCA is a normed scientific methodology to exhaustively assess the environmental impacts of a product or a service, over its entire lifetime from cradle to grave. Here LCA is performed by an in-house-developed literature-sourced model that follows the environmental management standards of the International Organization for Standardization (ISO), according to ISO 14040 260 and ISO 14044 (Wolf et al., 2012; Hauschild et al., 2018).

The objective of the LCA model is to assess the complete life-cycle GHG emissions associated with the production of one functional unit, which in this case is 1 kWh of electricity. Emissions are broken down in terms of life-cycle stages, components and materials. Only climate-change-related environmental impacts are considered, and other effects such as human toxicity, eco-toxicity, acidification or resource depletion are excluded.

265 The model is formulated in a parametric way, i.e it is not specific to a given wind turbine [model type](#), and it is generally applicable to contemporary onshore variable-speed horizontal-axis technology. It is assumed that the turbine is installed in Europe between [the years](#) 2015 and 2025, and has a lifetime of 20 years. The machine is composed by rotor, nacelle, drivetrain, tower and foundations, and the elements within these components (e.g., the generator); connection to the grid, storage or other equipment and devices are outside of the scope of this model.

270 The processes involved in each one of the life-cycle stages are modeled based on typical scenarios from Rydh et al. (2004); Vestas (2011, 2013a, b); Demir and Taskin (2013); Haapala and Prempreeda (2014); Ozoemena et al. (2018), among others. Emission factors are based on Ecoinvent IPCC 2013 (Myhre et al., 2013; Ecoinvent, 2019; Bourgault, 2019).

This LCA method considers the atmospheric emissions of all gases that are recognized to have a greenhouse effect, including CO<sub>2</sub>, CH<sub>4</sub>, N<sub>2</sub>O and fluorinated gases. For each one of these gases, the mass of CO<sub>2</sub> that would have the same greenhouse 275 effect is defined and used as a measure of impact (Myhre et al., 2013; Bourgault, 2019).

#### 3.3.1 Life-cycle stages

This section briefly defines the [life-stages](#) [life-cycle stages](#) considered in the present work, and the assumptions taken in each of them. For further details, the reader is referred to Guilloré et al. (2022).

- Life-cycle stage 1: Raw material extraction and processing. This stage accounts for the environmental impact upstream 280 of the purchasing of a unit of ready-to-use material for manufacturing. Raw material extraction and processing emissions

are modelled according to Ecoinvent (2019). -, assuming that all materials derive from primary sources – i.e. there is no recycled content.

- 285 – Life-cycle stage 2: Transportation of raw materials to manufacturing sites. This stage considers both direct emissions caused by the burning of transportation fuel, and indirect emissions produced in the life-cycle of the fuel from well to tank. Indirect emissions from the production of the transportation technology itself are also included. Based on Vestas (2011, 2013a, b), it is assumed that all materials are transported over a distance of 600 km to the manufacturing site, except for concrete, which is only transported over a distance of 50 km. Emission factors for transportation are considered from Ecoinvent (2019), assuming that materials are transported by freights and lorries heavier than 32 t, with EURO4 exhaust emissions (Spielmann et al., 2007).
- 290 – Life-cycle stage 3: Wind turbine component manufacturing. This stage considers the environmental impact of the energy consumed for the transformation of the materials into wind turbine components. The model includes the upstream environmental impact of the ~~energy consumed~~ consumed energy – which is generally electricity from the grid, whose impact in turn depends on the specific electricity mix ~~— is also considered~~. Manufacturing emissions are obtained from several sources (Song et al., 2009; Hill and Norton, 2018; Ecoinvent, 2019).
- 295 – Life-cycle stage 4: Transportation of the components to the wind plant site. For this stage, the same assumptions on transportation vehicles of the life-cycle stage 2 are taken, adding ship transport. Assumptions on transportation distances are modeled according to Vestas (2011, 2013a, b).
- 300 – Life-cycle stage 5: Assembly and installation of the wind turbine. This life-cycle stage considers the direct and indirect emissions from the assembly and installation of the different wind turbine components. It is assumed that a hydraulic crane is required for 16 hours of work (Rydh et al., 2004; Ozoemena et al., 2018).
- 305 – Life-cycle stage 6: Operation and maintenance (O&M). This stage considers different impacts related to operation and maintenance, and is defined according to Rydh et al. (2004); Vestas (2011, 2013a, b); Demir and Taskin (2013); Haapala and Prempreeda (2014); Ozoemena et al. (2018). The GHG emitted during O&M are determined as the sum of the emissions related to the turbine lubricant oil change, to the use of an inspection van and maintenance crane, and related to the replacement of components, as detailed next:~
- Lubricant Oil. The oil employed for the regular change of gearbox ~~oil and~~ lubricant is considered. Assumptions are taken according to Rydh et al. (2004), Haapala and Prempreeda (2014) and Ozoemena et al. (2018).
  - Inspection van. It is assumed that a roundtrip from the maintenance base is required every 6 months (Ozoemena et al., 2018) with a diesel passenger car of emission category EURO4 (Spielmann et al., 2007).
  - 310 – Maintenance Crane. It is considered that heavy crane machinery is required for a total of 8 hours over the turbine lifetime (Ozoemena et al., 2018).



– Replacements of components. All components may be subjected to failures, and generally several parts need to be replaced over the lifetime of a wind turbine. Failure rates are modeled according to Tremeac and Meunier (2009); Demir and Taskin (2013); Haapala and Prempreeda (2014); Ozoemena et al. (2018). Life-cycle stages 1 to 5 are used to estimate the emissions resulting from the spare components that need to be replaced. Additionally, the impact of the transport of the replacement components to the site is doubled, to account for the trip back with the ~~defect~~-replaced components.

– Life-cycle stage 7: Decommission and transportation of parts. This life-cycle stage considers 16 hours of crane work, as described in Rydh et al. (2004) and Ozoemena et al. (2018). The same assumptions taken for life-cycle stage 4 are used also here to estimate the emissions caused by the transportation of the parts to their EOL treatment centers.

– Life-cycle stage 8: EOL treatment. The EOL scenario is a key stage in the life-cycle of a wind turbine. Three treatments are considered in this work: recycling, incineration, and landfilling. In accordance with ISO 14044 (Wolf et al., 2012; Hauschild et al., 2018), the approach of closed-loop material cycle is considered, where full credit is given to the emissions of life-cycle stage 1 linked to the recycled materials. Recycled materials are therefore [here](#) considered to have a negative impact, and thus represent environmental benefits. Metals – steel, copper, and aluminium – have high recyclability rates, as shown in Fig. 2 (Tremeac and Meunier, 2009; Vestas, 2011, 2013a, b; Haapala and Prempreeda, 2014; Schmid, 2020). On the other hand, there is no mature technology yet for the recycling of thermoset glass-fiber reinforced polymers (GFRP), which are currently incinerated or landfilled (Schmid, 2020; Beauson et al., 2022), ~~depending on the legislation of the country. A representative scenario of 50% incineration and 50% landfilling is assumed here, as described in Vestas (2011, 2013a, b).~~ The overall EOL impact is the sum of the recycling, incineration and landfilling environmental impacts. This quantity can either be positive or negative, depending on whether or not the recycling benefits outweigh the incineration and landfilling environmental impacts. Whether blade EOL is by incineration or landfilling depends on the legislation of the country, which is far from uniform even across Europe; for example, some countries like Germany or the Netherlands prohibit the landfilling of composites altogether (WindEurope, 2020; Beauson et al., 2022). On the contrary, the landfilling of wind turbine blades is widespread in the US, due to its low cost and the lack of specific legislation that prohibits it (Beauson et al., 2022; Ramirez-Tejeda et al., 2017). As the present study is located in Germany, a scenario of 100% incineration is used here. Clearly, this is a simplification of a much more complex EOL reality, because other solutions – such as cement co-processing – are used in Germany for the EOL of blades (WindEurope, 2020; Beauson et al., 2022).

### 3.3.2 Validation of the LCA model

The LCA model was validated against results published by Schleisner (2000); Tremeac and Meunier (2009); Vestas (2011, 2013a, b); Al-Behadili and El-Osta (2015); Ozoemena et al. (2018), as shown in Fig. 3.

In general, there is a good match between previous studies and the present model. Differences arise due to non identical hypotheses and assumptions ~~, for instance~~ in life-cycle scenarios, bill of materials, ~~or energy production. Indeed,~~ [energy](#)

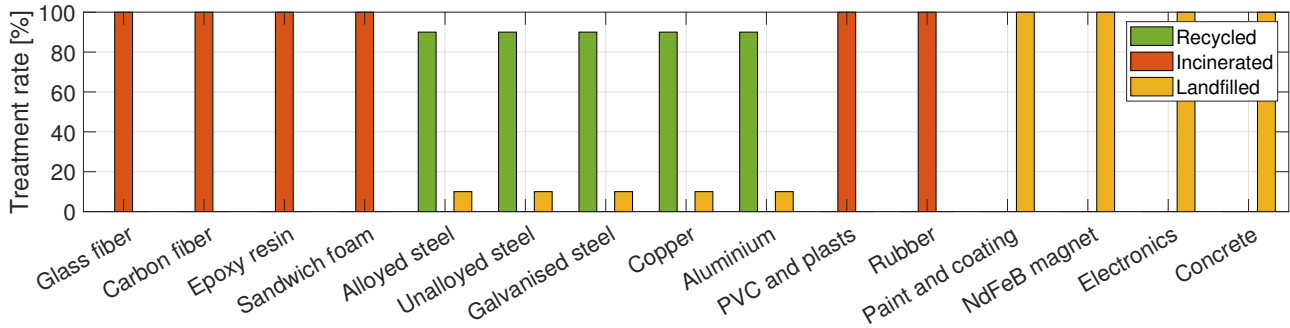

**Figure 2.** EOL treatment rates (by mass) for various materials types.

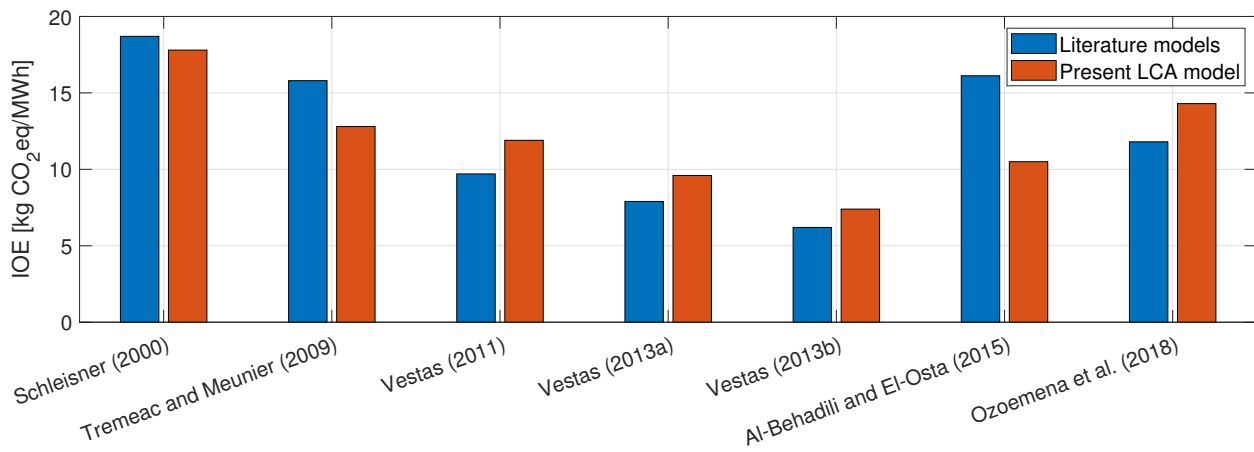

**Figure 3.** Comparison of the environmental impact obtained with the present LCA model and with results sourced from the literature.

345 [production, or other aspects of the models. For example, Vestas \(2011, 2013a, b\) consider an average EOL treatment for](#)  
[composites of 50% incineration and 50% landfilling, while a scenario of 100% incineration is assumed in the present study; the](#)  
[study of Al-Behadili and El-Osta \(2015\) is located in Lybia, while the present one in Europe; additionally, Ozoemena et al. \(2018\)](#)  
[apply a recycled content approach and therefore do not consider any recycling credit at end of life. Additionally, several publi-](#)  
 cations do not thoroughly detail the assumptions ~~taken~~ [they are based on](#), or the processes considered in the different life-stage  
 350 cycles, which hinders an exact comparison.

### 3.4 Cost model

Costs are based on the 2015 NREL cost model (NREL, 2021), converted to 2017 € values. The model estimates the initial capital costs and O&M costs. Initial capital costs include rotor, nacelle, drivetrain, tower and foundations, as well as balance of station (BOS) costs, including transportation, assembly and installation. Additional BOS-related costs such as engineering,

355 permitting, and grid connection are excluded, as their environmental impact is not considered in the present LCA model. Annual operating expenses include O&M costs, whereas land lease costs are not considered.

### 3.5 Value estimation model

This model estimates the economic and environmental value of a wind turbine, for a specific location and a specific time frame, as illustrated in Fig. 4.

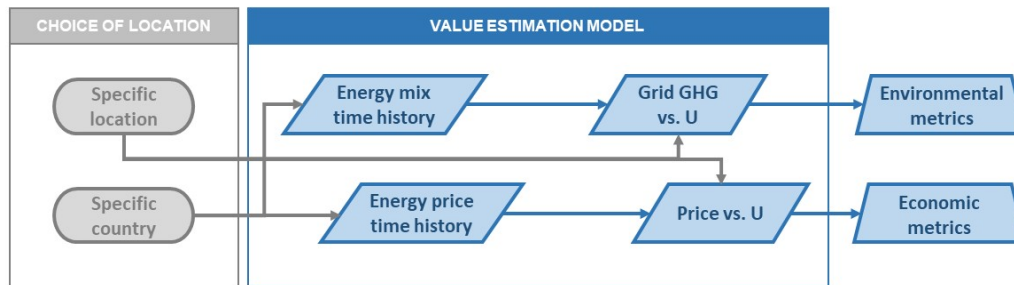

**Figure 4.** Workflow of the value estimation model of Fig. 1. Rounded squares represent variables, squares are models, rhombuses are data, and trapezoids are merit functions/metrics.

360 The estimation of economic value is based on historical data, using Eq. (4). Time series of spot market price were correlated with time series of wind speed at a specific location and hub height, resulting in the price-wind model  $p_y(U)$ . Similarly, the environmental value was estimated with Eq. (11), where the grid average emission factor  $f_{\text{grid}}(U)$  was computed based on the energy mix time history of the country, or region, where the turbine is located. The average emission factor of each generation technology in the mix was obtained from Ecoinvent (2019), and only considers operational emissions (Thomson et al., 2017; Boeing et al., 2019). Wind speed time histories were adjusted to the turbine hub height based on the site mean shear, and were used to estimate the Weibull distribution, spot market price, and to adjust the price-wind  $p_y(U)$  and grid-average emission factor  $f_{\text{grid}}(U)$  factors.

### 3.6 Optimal design problems

In this work two different design problems are considered, based on either a single- or a two- objective constrained optimization.

370 In both cases, the problem is formulated as:

$$\min_{\mathbf{p}} J(\mathbf{p}), \quad (15a)$$

$$\text{such that: } \mathbf{c}(\mathbf{p}) \leq 0, \quad (15b)$$

where  $J$  is the cost function, chosen among the design metrics of Sect. 2,  $\mathbf{p} = (D, H)$  are the design variables, with  $D$  the rotor diameter and  $H$  the hub height. Finally,  $\mathbf{c}$  are inequality constraints that enforce desired design conditions.

375 The single-objective optimization problem is solved with a sequential quadratic programming algorithm, in which gradients are computed by means of finite differences (Mathworks, 2019). The multi-objective optimization problem is solved with a non-dominating sorting genetic algorithm (NSGA-II) (Seshadri, 2020).

This simplified design problem is termed *preliminary*, in the sense that it only determines macroscopic parameters of the machine. Based on the results of this preliminary sizing, standard detailed design procedures should be used to dimension all  
380 components and systems ([Bortolotti et al., 2016](#)).

#### 4 Case study: cost-driven and eco-conscious designs of a wind turbine for Germany

Trade-offs were investigated between an economic and an environmental point of view, by analyzing the characteristics of the resulting optimal turbines with respect to a standard LCOE-driven baseline assumed as reference. The study was performed with the methods described in the previous sections, where the cost model was tuned to represent the situation in Germany  
385 according to Deutsche WindGuard (2018) and Duffy et al. (2020).

##### 4.1 Baseline description

The baseline is chosen to represent a recent LCOE-driven industrial product, and corresponds to a wind class IIA machine with a rated power of 3 MW, a rotor diameter of 115.7 m, a hub height of 92 m, and a lifetime of 20 years. These characteristics make the baseline loosely resemble one of the several E-115/3.0 MW models (Enercon, 2021) that, according to  
390 Deutsche WindGuard (2018), was the most installed turbine in Germany in 2016, 2017 and 2018 – the years considered in this study. [According to the adopted mass models \(see §3.2\), the rotor blade has a mass of 13 t and a steel tower of 190 t. The main key cost items of the baseline turbine, based on the cost model described in §3.4 and shown in Table 1, are in line with the values provided by Deutsche WindGuard \(2018\) and Stehly et al. \(2017\). Slightly lower operating expenditures are reported by Stehly et al. \(2017\), because of the different location of the study \(Duffy et al., 2020\).](#)

395 This wind turbine has an IOE of ~~11.83~~[12.37](#) kg CO<sub>2</sub>eq/MWh and an LCOE of ~~35.6~~[38.6](#) €/MWh, according to the models of §3.4. Given the typical large uncertainties in the discount rate,  $d = 0$  was assumed in Eq. (1).

Figure 5 shows a breakdown of the environmental cost of the wind turbine by its principal components. The figure reports both ~~absolute emissions per unit of component mass (green bars), as well as~~ relative emissions with respect to the overall impact produced by the wind turbine (blue bars), [as well as absolute emissions per unit of component mass \(green bars\)](#). Tower and  
400 foundations play the largest role in the overall IOE, each one accounting for about 20% of the total. The high environmental impact of the foundations is due to the significant amount of concrete that they require, and the negative effects caused by landfilling at the end of life. The tower, on the other hand, is made of steel, a material with a high recyclability rate (see Fig. 2). Notwithstanding the resulting emissions credits at the end of life, the tower still has a significant environmental impact because of its very large mass. Blades also present a large environmental impact, because of their reduced recyclability. Electronics  
405 have the highest impact per unit of material, but a small overall contribution due to their reduced mass.

**Table 1.** Comparison of some key cost items of the baseline turbine with values sourced from the literature.

|                              | Baseline    | Deutsche WindGuard (2018) | Stehly et al. (2017) |
|------------------------------|-------------|---------------------------|----------------------|
| Rated power [MW]             | 3           | 2 to 3                    | 2.32                 |
| Diameter [m]                 | 115.7       | ~                         | 113                  |
| Hub height [m]               | 92          | less than 100             | 86                   |
|                              | Cost [€/kW] | Cost [€/kW]               | Cost [€/kW]          |
| Rotor                        | 274         | ~                         | 276                  |
| Drivetrain & Nacelle         | 400         | ~                         | 469                  |
| Tower                        | 192         | ~                         | 206                  |
| Turbine capital expenditures | 866         | 1000                      | 951                  |
| Balance of station           | 343         | 331                       | 313                  |
| Operating expenditures       | 54          | 52                        | 38                   |

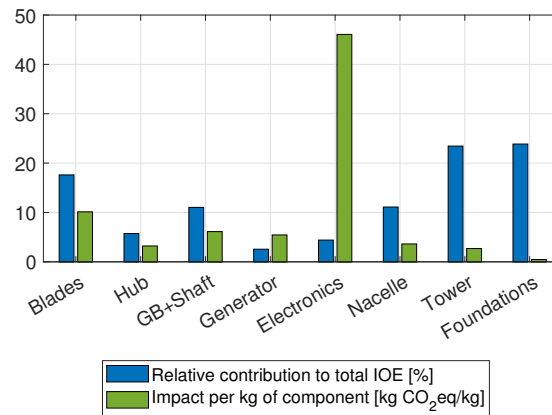

**Figure 5.** Environmental impact of the life-cycle of each component of the baseline wind turbine, expressed in terms of **absolute emissions per unit of component mass (green bars)**, and relative percent emissions with respect to the overall impact of the machine (blue bars), and **absolute emissions per unit of component mass (green bars)**.

## 4.2 Cost-driven design

The baseline turbine was then optimized from an economic-environmental cost perspective. Only hub height and rotor diameter are free design variables, whereas rated power is held fixed to the baseline value. The bi-objective design problem is expressed by Eq. (15), where  $J$  considers economic cost by LCOE and environmental cost by IOE. The design constraints of Eq. (15b) are set to express conditions on height/diameter ratio and on the specific power of the turbine:

$$0.5 < \frac{H}{D} < 1, \quad (16a)$$

$$100 \text{ MWm}^{-2} < \frac{P_r}{A} < 350 \text{ MWm}^{-2}, \quad (16b)$$

where  $P_r$  is the rated power, and  $A = \pi D^2/4$  is the rotor swept area. These same inequality constraints were used also in all the following design problems.

Figure 6a shows the resulting Pareto front of optimal non-dominating solutions. The corresponding optimal rotor diameters and hub heights of the Pareto front designs are shown in Fig. 6b.

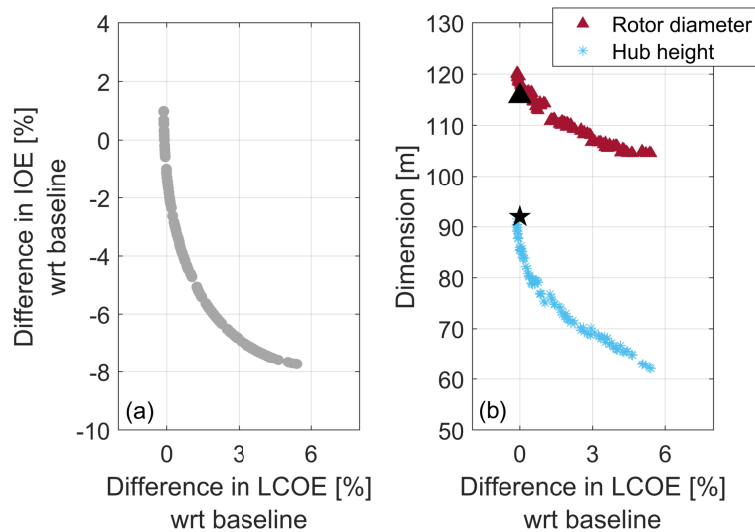

**Figure 6.** Pareto front of IOE vs. LCOE (a). Rotor diameter and hub height of the Pareto optimal designs (b). Differences are expressed with respect to the baseline configuration, whose dimensions are given-indicated by black  $\blacktriangle$  (diameter) and  $\blackstar$  (hub height) symbols.

Results indicate that a decrease in IOE can be achieved by reducing the overall size of the turbine, both in terms of rotor diameter and hub height; since rated power is held fixed, the resulting turbines have an increased specific power  $P_r/A$ . A maximum reduction in IOE of about 8% is achieved at the expense of an increase of about 5% in LCOE.

However, what is it is even more interesting to observe is that the curve is very steep close to the point of minimum LCOE. This means that a significant reduction in IOE can be achieved with marginal increments in LCOE. For instance, a turbine with

a 110 m diameter and a 75 m hub height presents an LCOE that is only 1% higher than the baseline, while at the same time achieving it achieves an IOE reduction of about 5%. This result is achieved-obtained by the design of smaller rotors and shorter towers that, although imply a somewhat reduced power capture, have lower environmental costs.

#### 425 4.3 Value-driven design

The previous section showed that, from a cost perspective, there is room to reduce the impact on the environment if one is willing to accept some increase in the cost of energy from wind. However, cost by itself does not capture the full complexity of the problem, and further insight can be obtained by including also value in the analysis.

To this end, the turbine was optimized considering economic and environmental value, instead of cost. Two different loca-  
 430 tions in Germany were selected: one in the north of the country (labelled LN in the following), characterized by very good wind conditions, and a second one in the south (labelled LS), with lower average wind speeds. The site wind characteristics are more precisely shown by the two Weibull distributions reported in Fig. 7 (NEWA, 2021).

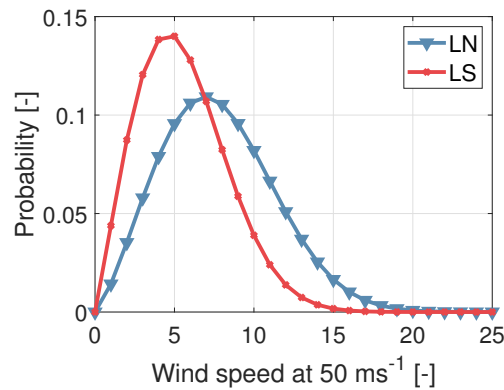

**Figure 7.** Weibull distributions at the northern and southern German locations, at 50 m height above ground.

The economic and environmental values were estimated with the model described in §3.5. Day-ahead spot market price and energy mix time series were collected from the SMARD database (SMARD, 2020), and completed with wind speed time series  
 435 obtained from NEWA (2021), considering the years 2016, 2017 and 2018. All quantities were sorted into 50 wind speed bins, each containing the same number of data points. The resulting interpolating curves were A trend curve of cost vs. wind speed was obtained from the mean values of each bin, and extrapolated above the last bin upper boundary all the way to cut-out wind speed.

Figure 8 and 9 respectively show the histograms-curves of spot market price and grid GHG emissions vs. wind speed at 50 m  
 440 height at the LN and LS sites ; for the three considered years. To reduce clutter, the figures only show 9 of the 50 bins used to create the curve. For both locations, the spot market price and grid GHG emissions exhibit a decreasing trend with respect to wind speed. In fact, at low wind speeds there is a large amount of energy from coal-fired power stations in the energy mix, pushing both the price and grid GHG emissions up. With higher wind speeds, the amount of wind energy in the grid increases,

so that more expensive and polluting energy sources are displaced. This is clearly a partial view of the behavior of a very  
 445 complex system, which does not only depend on wind speed.

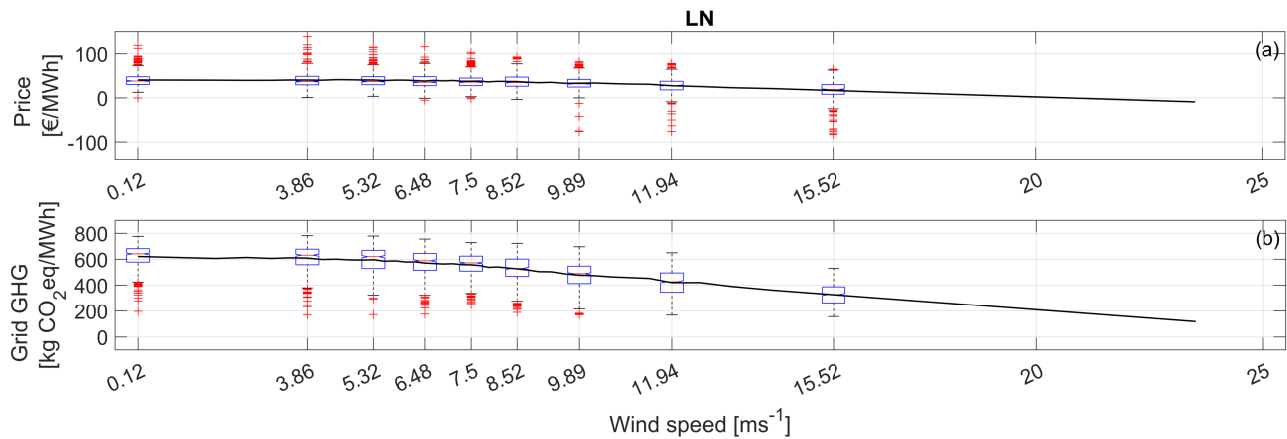

**Figure 8.** Spot market price (a) and grid GHG emissions (b) vs. wind speed at 50 m for LN (site in the north of Germany). In the boxplots, the central red mark indicates the median, and the bottom and top blue edges of the box indicate the 25th and 75th percentiles, respectively. Whiskers extend to the most extreme data points not considered as outliers, whereas outliers are plotted individually using a red '+' symbol. Above 15.52 ms<sup>-1</sup>, the curve is extrapolated.

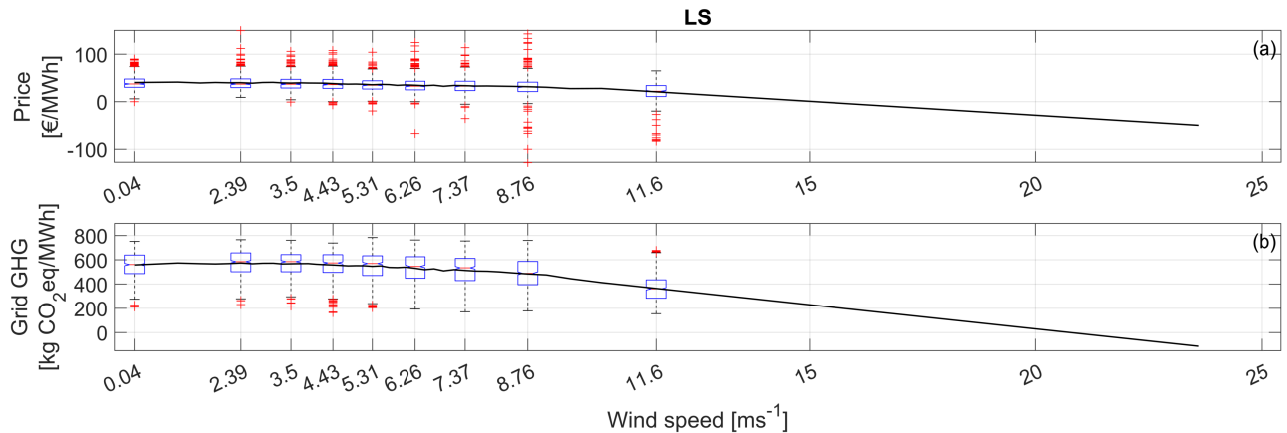

**Figure 9.** Spot market price (a) and grid GHG emissions (b) vs. wind speed at 50 m for LS (site in the south of Germany). The data is plotted as in Fig. 8, with the extrapolation starting at 11.6 ms<sup>-1</sup>.

### 4.3.1 Single-objective optimization

First, a single-objective optimization was run for each metric at the two locations in order to analyze the behavior of the optimal turbine design characteristics. The resulting diameters are shown in Fig. 10a, while the hub heights are given in Fig. 10b. The



figures of merit are organized from left to right as follows: the first two are cost-based metrics (LCOE and IOE), the next two are value-based metrics (LVOE and EVOE), and finally the last two are net-value-based metrics that consider both cost and value (NVOE and NEVOE).

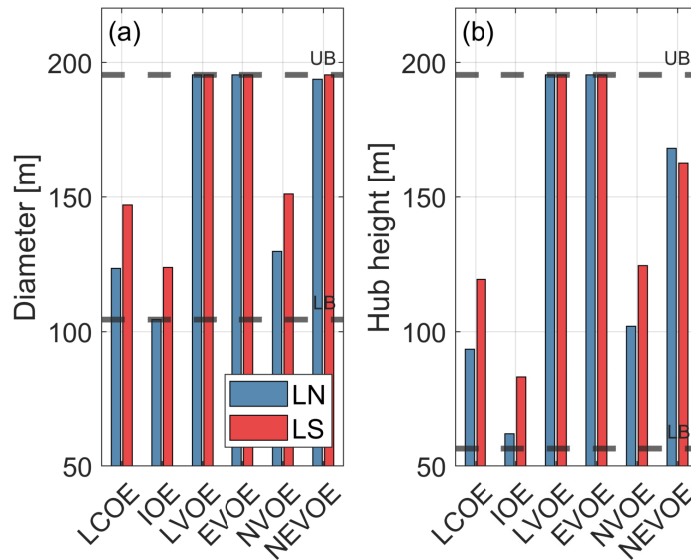

**Figure 10.** Optimal diameters (a) and hub heights (b) for each single objective function, for the two locations. Cost-based metrics: LCOE, IOE; value-based metrics: LVOE, EVOE; net-value-based metrics: NVOE, NEVOE.

Analyzing first the cost-based perspective, results indicate that, as already observed in §4.2, a turbine designed for minimum IOE has a smaller rotor and a shorter tower than a turbine designed for minimum LCOE, on account of their large environmental impact. For both metrics, the southern location LS requires a turbine with a larger rotor and a taller tower than the northern location, due to lower typical wind speeds.

From a value point of view, no differences in rotor diameter and hub height are found between the economic (LVOE) and the environmental (EVOE) perspectives. In fact, for both metrics, the optimal rotor and hub height are as large as possible, hitting the lower bound for specific power. This can be explained by noticing that, since low wind speeds are associated with larger economic and environmental values (see Figs. 8 and 9), optimal economic/environmental value-driven designs tend to produce as much as possible at low wind speeds. This can be achieved by minimizing the extent of the partial load region (region II), which is obtained by reducing the rated wind speed  $V_r = \sqrt[3]{2P_r/\rho AC_{P_{\max}}}$ , where  $\rho$  is the air density and  $C_{P_{\max}}$  the maximum power coefficient of the rotor. As shown by the formula, since  $C_{P_{\max}}$  is limited by physics, for given ambient conditions  $\rho$ ,  $V_r$  decreases for smaller specific powers  $P_r/A$ . These results are in line with similar studies that have shown how low **specific power** turbines have a higher economic value (Hirth and Mueller, 2016; Swisher et al., 2022).

Finally, both NVOE and NEVOE – which consider both cost and value – lead to configurations that can be interpreted as compromises between the cost and value perspective. For NVOE, as economic value has the same order of magnitude as

economic cost, the solution presents a rotor diameter and hub height that fall in between the cost- and value-based solutions. On the other hand, for NEVOE the environmental value is one order of magnitude larger than the environmental cost, and this drives the rotor size, which even in this case hits the lower limit for specific power. The introduction of cost, however, penalizes the hub height, which is reduced with respect to the value-based solution because of the large influence of the tower.

### 4.3.2 Bi-objective optimization

Next, trade-offs between the economic and environmental net value were analyzed through a Pareto front, computed solving the bi-objective optimization problem expressed by Eq. (15). The LCOE-driven designs obtained in the previous section and displayed in Fig. 10 are used here as baselines for each location.

For the two sites LN and LS, Fig. 11a shows the Pareto front NEVOE vs. NVOE, while Fig. 11b reports the change in rotor diameter and hub height with respect to the baselines, as functions of NVOE. As already observed in Fig. 6, even in this case results indicate that it is possible to increase the environmental net value (NEVOE) without significantly decreasing the economic net value (NVOE). For example, accepting a decrease in NVOE of 1 €/MWh buys half of all possible improvement in NEVOE, for both locations. This is achieved with larger diameters (i.e., smaller specific powers), and taller hub heights.

Another interesting observation is that both locations present the same Pareto front shape. While LN has a better economical performance than LS (as expected, because of the better wind resource), both locations appear to have a similar net value from an environmental point of view.

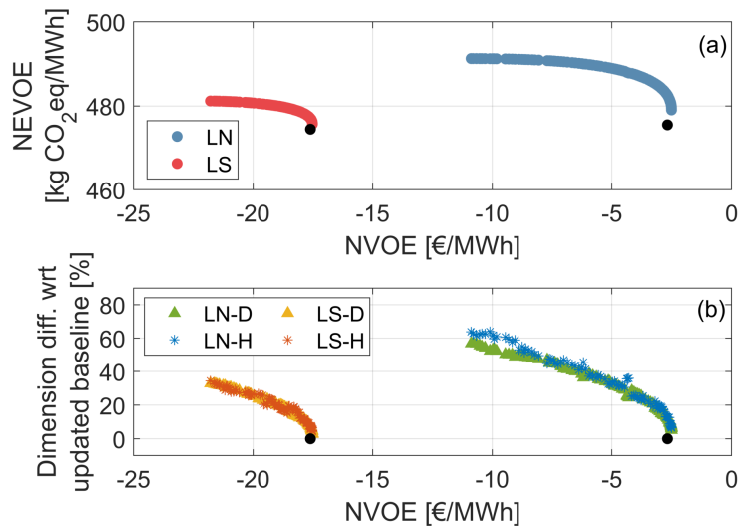

**Figure 11.** Pareto front between a net environmental value point of view (NEVOE) and a net economic value point of view (NVOE) (a). Optimal diameters and hub heights for the solutions of the Pareto front, expressed as percent changes with respect to the corresponding LCOE-driven baseline of each location (b)

Finally, environmental net value was used to estimate future economic societal savings, multiplying NEVOE by SCC, as described in §2.2.4. An SCC of 1 €/kg CO<sub>2</sub>eq was considered in this work. However, as previously noted, SCC can take widely different values depending on the assumptions and models considered (IPCC, 2007). Although this makes the resulting FSS values affected by high uncertainty, the analysis is still useful because it may reveal interesting trends.

Figure 12 presents the designs that result from trading LCOE – the metric currently used to assess the competitiveness of an energy-producing technology – with FSS – the metric proposed here to estimate the future societal savings obtained by deploying an energy-producing technology.

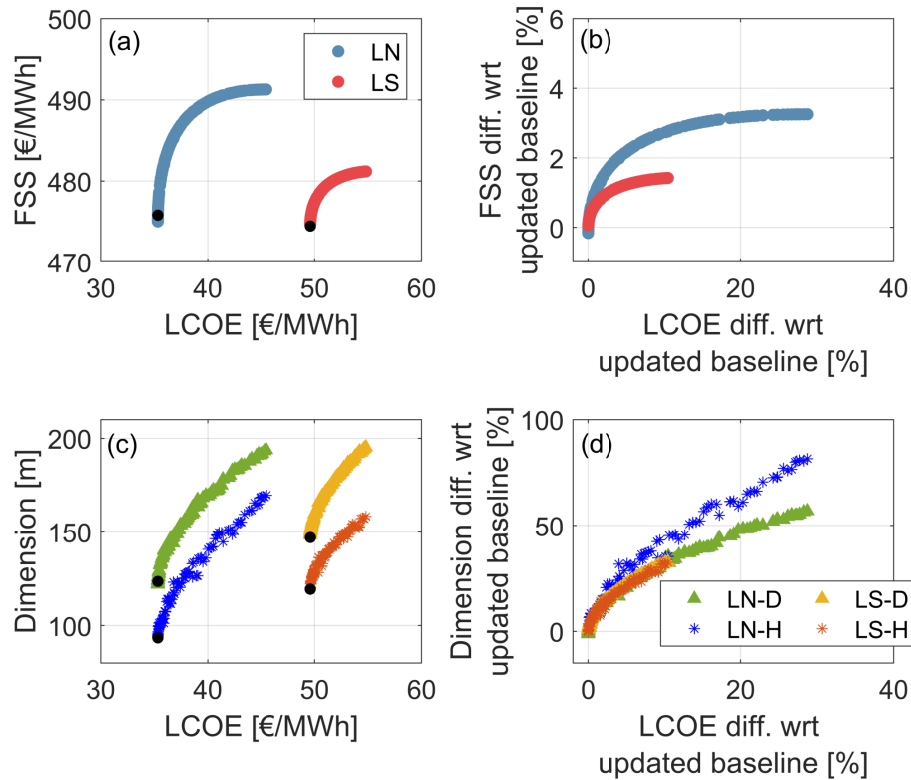

**Figure 12.** Pareto front between FSS and LCOE, in absolute values (a), and relative to the LCOE-driven baseline of each location (b). Optimal diameters and hub heights of the Pareto solutions in absolute values (c), and relative to the corresponding LCOE-driven baseline of each location (d).

The Pareto front is displayed in absolute quantities in Fig. 12a, and relative to the LCOE-driven baselines in Fig. 12b. Similarly, the solutions of the Pareto front are displayed in absolute quantities in Fig. 12c, and relative to the baseline configurations in Fig. 12d. The values shown here should be treated only as rough estimates because of the many simplifications and assumptions. Nonetheless, some interesting trends seem to emerge.

495 First, as expected, the current LCOE-driven designs (which capture the individual point of the view of the investor and consumer) are not optimal from the societal point of view. This means that, to improve the societal metric, an individual would have to accept an increase in out-of-pocket expenditure.

Second, the largest opportunities appear to be close to the LCOE optima, where the curves are very steep. This means that even marginal increases in cost can have an impact on the societal savings. However, away from the LCOE optima, the curves level off, meaning that optimal societal savings would require significant increases in cost, which would probably not  
500 be acceptable by consumers.

Third, the general trend of the Pareto solutions is similar at both sites. Hence, even at sites characterized by poor wind resources, there is room for improving the societal value of wind energy.

Fourth, although better wind resources at the ~~northern Germany site~~ site in northern Germany are associated with lower costs, the societal savings are similar at both locations. This is an interesting finding, because it implies that the installation  
505 of each new wind turbine is of a similar environmental and societal value, independently of the characteristics of the site. However, since sites with worse wind resources are penalized by a higher LCOE, policies may be needed that – by taking a long-term view on future economic societal savings – increase in the short-term the competitiveness of wind turbines at these locations.

## 5 Conclusions

510 This paper has explored the idea of enhancing the inherent societal value of wind turbines by changing the way they are designed. While societal value is clearly a very broad concept, the focus here is on the societal benefits brought by the displacement of environmental emissions made possible by the generation of renewable energy from wind.

The paper first defined metrics that quantify the societal value of wind turbines based on two concepts: *environmental cost* and *environmental value*. The former expresses the GHG emissions generated throughout the entire lifetime of a wind turbine,  
515 while the latter quantifies the displacement of GHG emissions from the grid caused by the deployment of a wind turbine; in both cases, these quantities are computed per unit of generated energy. These metrics are defined mirroring already existing economic metrics, based on the familiar concepts of economic cost and value.

Next, a toolchain was described, which implements a complete LCA model capable of estimating the emissions of a wind turbine throughout its lifetime, broken down in life-cycle stages, components and materials. Using the LCA model, together  
520 with energy and mass models, a simplified design problem was formulated, which can determine the optimal geometric characteristics of a wind turbine (in terms of its rotor diameter and hub height) for a given rated power. The resulting preliminary design gives only the overall dimensions of the turbine, and would have to be followed by a detailed design of its aerodynamics, structures, systems and control laws. The design problem can be formulated either as a single or a multi(bi)-objective minimization. The classical standard approach of designing wind turbines by minimizing LCOE is included in the formulation  
525 as a special case.

A 3 MW wind turbine, representative of the LCOE-driven machines currently installed in Germany, was chosen as a baseline reference to study the effects of considering various possible economic and/or environmental metrics in the preliminary sizing problem.

530 The environmental assessment of the baseline highlighted the large contribution of the foundations – made of concrete –, and of the tower – made of highly-recyclable steel – to the total life-cycle emissions of the wind turbine. These components have low emission factors – i.e., a low environmental cost per unit of mass – but require large quantities of material. Electronic components, on the other hand, have a modest overall contribution even if they have very high emission factors. Clearly, the overall environmental cost of a wind turbine depends on the technological solutions chosen for its main components. Indeed, choices at all stages of the life-cycle – from the processes used to mine or produce the materials to EOL decisions –  
535 have implications on both the economic and environmental costs, as the two aspects are intimately connected. Understanding the environmental cost of each material, each component and each life-cycle stage is critical for identifying alternatives that minimize both forms of cost.

The baseline turbine was then redesigned using a bi-objective optimization for LCOE and IOE, obtaining a Pareto front of optimal non-dominating solutions. This family of solutions can be interpreted as the cost-optimal designs that trade the point  
540 of view of the individual (LCOE) with the point of view of society (IOE). It is one of the main findings of this work that the Pareto front is very steep around the LCOE-optimal designs. For the case considered here, it appears that an LCOE increase of only 1% can buy an IOE decreases of 5%. In other words, it pays off to be altruistic, and a large societal impact can be achieved if consumers are willing to pay a bit more for the energy that they consume.

Finally, the effects of value and net value were considered, again looking at both the economic and environmental points of  
545 view. Value-based metrics are location- and time-dependent quantities, and therefore tightly linked to the site where the wind turbine is installed. Two locations were considered: one in the north of Germany with better wind resources, and one in the south of the country, where typical wind speeds are lower. Results show that, for the years considered here, spot market price and grid GHG emissions are generally higher at low wind speeds for both sites, as generally expected.

A Pareto front of optimal solutions was generated that trades-off economic net value – i.e. the difference between economic  
550 value and cost –, and environmental net value – similarly defined, but considering emissions. Results indicate that, here again, the curves are very steep close to the net-value economic optima. Therefore, even from this point of view altruism pays off, and significant net value environmental gains can be achieved with rather small losses in net economic value.

Unsurprisingly, economic net values were found to be profoundly different at the two locations, the better wind resources in the north being associated with much lower values of NVOE. However, interestingly, the environmental net values at the two  
555 locations were found to be very similar. This result points to the fact that wind turbines have similar beneficial effects no matter where they are installed, with little sensitivity to the local wind resources ([at least for the present German scenario](#)). Therefore, wind energy is a sensible choice also for places with modest wind conditions, as for example the south of Germany. **Clearly, these-These** results should be further explored considering transmission constraints.

Additionally, it was found that environmental value is one order of magnitude larger than environmental cost, whereas economic value and cost are of the same order of magnitude. Consequently, the economic net value is more sensitive than the envi-  
560 nomic value and cost are of the same order of magnitude. Consequently, the economic net value is more sensitive than the envi-

ronmental one to the characteristics of the location. This conclusion, here again, is valid only for the specific electricity market of Germany. Further studies should analyze the environmental and economic value of wind turbines in different electricity markets, for example with a smaller or larger penetration of renewables.

565 Finally, future societal savings were estimated by using the societal cost of carbon, which quantifies the present cost of future damage caused by the emission of one additional unit of CO<sub>2</sub>eq. Similar conclusions as the ones discussed earlier can be drawn from these results.

This study shows that, in general, low ~~specific-power~~ specific-power turbines present higher economic and environmental values, at the expense of a higher cost of energy. This is due to the fact that, with the present technology, the larger energy captured by a bigger rotor does not generally compensate its larger cost. However, the present findings highlight that the benefits of low ~~specific-power~~ specific-power turbines go well beyond what is quantified through LCOE alone, which, in 570 hindsight, appears to be a rather myopic and incomplete metric. Indeed, several studies have shown that low ~~specific-power~~ specific-power turbines bring benefits beyond economic value: for instance they can better utilize the transmission system, reduce forecasting errors, and could lead to cheaper financing (Hirth and Mueller, 2016; Swisher et al., 2022).

The present work and its findings are affected by several limitations.

575 First, the LCA, mass, and cost models are based on general trends of current wind turbines. Clearly, low ~~specific-power~~ specific-power machines push the boundaries of these models. More accurate estimates could be obtained by using detailed design procedures (for example, see Bortolotti et al. (2016); NREL (2021)) that, from the rough sizing produced by the present approach, yield refined designs.

580 Additionally, the study could be extended to investigate the impact of additional variables; one such example is rated power, which was assumed here to be given and fixed, but in reality could be freed to possibly reveal other features of the solution space.

The trends shown here are only valid for Germany in the years considered. Clearly, both economic and environmental value depend on the time-specific composition of the energy mix, whose behavior is very complex and depends on more variables than just wind speed, as it was assumed here for simplicity. The assumptions taken in this work are clearly oversimplifications that try to produce initial rough preliminary trends. Future work should couple the present models with more sophisticated 585 descriptions of the energy mix, able to capture their present and future composition. In fact, understanding how the economic and environmental value of wind energy will develop in the ~~next-years~~ future is yet another crucial element that deserves further work. Indeed, as wind penetration is set to increase, the economic value of wind energy is expected to decrease, an effect called “self-cannibalization”. However, predicting the impact of an increase in wind energy is not straightforward, as the final effects 590 depend on the emission factors of the generating technologies in the energy mix. The impact on displaced GHG is even more complex to estimate, as it depends on the emission factors of the generating technologies operating on the margin, which are not only strongly country-specific, but also time-dependent. Here again, these effects can only be properly captured by using more sophisticated models, including an electricity market model.

595 The results presented in this work are subject to significant uncertainties. Indeed, in addition to the uncertainties brought by the variable nature of the wind resource, one should also consider the uncertainties brought by the volatility of the electricity

market, and the uncertainties in the LCA model (which are significant, given the holistic nature of a life-cycle analysis, with its many stages and potentially complex processes). While mean yearly values were used in this preliminary work for simplicity, further studies should be conducted from a probabilistic point of view – for instance through uncertainty quantification methods – to produce a more detailed picture of the variability of the economic and environmental cost and value of wind turbines.

Notwithstanding these limitations, it was one major ambition of this paper to bring the inherent societal value of wind turbines under the spotlight. Indeed, the paper shows that a purely economic analysis paints only a very partial picture of the true nature and possible role of a wind turbine (and, more in general, of wind energy). Indeed, enlarging the perspective away from economics can uncover new opportunities for the future development of wind. While this study only focused on the changes in overall dimensions (and, in turn, specific power) of the machine, the potential for further improvements is much larger than what would appear by this simple analysis alone. In fact, the same metrics developed here can also be employed to guide the choice of technologies and the detailed design of the various components of a wind turbine. In addition, beyond the single wind turbine case analyzed here, this new eco-conscious design philosophy can be used to design a whole wind plant.

*Author contributions.* HC led the development of the work, in close collaboration with AG and CLB. AG developed and validated the LCA model. CLB supervised the research. HC and CLB wrote the paper, with inputs from AG. All authors provided important input to this research work through discussions, feedback and by writing the paper.

*Competing interests.* The authors declare that they do not have conflicts of interest, except for CLB who is the Editor in Chief of WES.

*Acknowledgements.* The authors acknowledge the participation of Samuel Kainz and Guillermo Fuente Taravillo, both from the Technical University of Munich, the former for the revision of the LCA model, and the latter for the collection of wind speed data for different locations in Germany and for input in the early stages of the work.

## Nomenclature

|     |                  |
|-----|------------------|
| $A$ | Rotor swept area |
| $C$ | Cost             |
| $D$ | Rotor diameter   |
| $E$ | Energy           |
| $H$ | Hub height       |
| $J$ | Cost function    |
| $P$ | Power            |

|     |                        |                                                                                                     |
|-----|------------------------|-----------------------------------------------------------------------------------------------------|
|     | $T$                    | Duration                                                                                            |
| 625 | $Q$                    | Emissions                                                                                           |
|     | $U$                    | Wind speed                                                                                          |
|     | $V$                    | Value                                                                                               |
|     | $W$                    | Weibull distribution                                                                                |
|     | $c$                    | Constraints                                                                                         |
| 630 | $d$                    | Discount rate                                                                                       |
|     | $f$                    | Factor                                                                                              |
|     | $p$                    | Spot market price                                                                                   |
|     | $\mathbf{p}$           | Design parameters                                                                                   |
|     | $t$                    | Time                                                                                                |
| 635 | $\text{CO}_2\text{eq}$ | Equivalent <u>grams-mass</u> of $\text{CO}_2$ with the same global warming potential of a given gas |
|     | $(\cdot)_y$            | Relative to year $y$                                                                                |
|     | EOL                    | End of life                                                                                         |
|     | EVOE                   | Environmental value of energy                                                                       |
|     | FSS                    | Future societal savings                                                                             |
| 640 | GFRP                   | Glass-fiber reinforced plastic                                                                      |
|     | GHG                    | Greenhouse gas, i.e. $\text{CO}_2$ , $\text{CH}_4$ , $\text{NO}_2$ , F-gases, among others          |
|     | IOE                    | Impact of energy                                                                                    |
|     | LCA                    | Life-cycle assessment                                                                               |
|     | LCOE                   | Levelized cost of energy                                                                            |
| 645 | LVOE                   | Levelized value of energy                                                                           |
|     | NEVOE                  | Net environmental value of energy                                                                   |
|     | NVOE                   | Net value of energy                                                                                 |
|     | SCC                    | Societal cost of carbon                                                                             |



## 650 References

- Al-Behadili S.H. and El-Osta W.: Life Cycle Assessment of Dernah (Libya) wind farm, *Ren. Energy*, 83, 1227-1233, <https://doi.org/10.1016/j.renene.2015.05.041>, 2015.
- Aldersey-Williams J. and Rubert T.: A theoretical justification and critical assessment, *Energy Policy*, 124, 169-179, <https://doi.org/10.1016/j.enpol.2018.10.004>, 2019.
- 655 Beauson J., Laurent A. and Pagh Jensen J.: The complex end-of-life of wind turbine blades: A review of the European context, *Renewable and Sustainable Energy Reviews*, 155, 111847, [doi.org/10.1016/j.rser.2021.111847](https://doi.org/10.1016/j.rser.2021.111847), 2022.
- Beiter P., Cooperman A., Lantz E., Stehly T., Shields M., Wisser R., Telsnig T., Kitzing L., Berkhout V., Kikuchi Y.: Wind power costs driven by innovation and experience with further reductions on the horizon, *WIREs Energy and Environment*, 10 (5), <https://doi.org/10.1002/wene.398>, 2021.
- 660 Bortolotti P., Bottasso C.L., Croce A.: Combined preliminary-detailed design of wind turbines, *Wind Energy Science*, 1, 71-88, <https://doi.org/10.5194/wes-1-71-2016>, 2016.
- Bortolotti P., Berry D., Murray R., Gaertner E., Jenne D., Damiani R., Barter, G.E. and Dykes, K.: A Detailed Wind Turbine Blade Cost Model, NREL Report TP-5000-73585, NREL, Golden, CO, USA, <https://dx.doi.org/10.2172/1529217>, 2019.
- Boeing F. and Regett A.: Hourly CO2 Emission Factors and Marginal Costs of Energy Carriers in Future Multi-Energy Systems, *Energies*, 665 12, 2260, <https://doi.org/10.3390/en12122260>, 2019.
- Bourgault G.: Implementation of impact assessment methods in the ecoinvent database version 3.6, Ecoinvent, Swiss Center for Life Cycle Inventories, Tech. Report, 2019.
- Deutsche Bundesnetzagentur: SMARD Strommarktdaten platform, [smard.de/home](http://smard.de/home), 2020.
- Deutsche WindGuard: Wissenschaftlicher Bericht: Vorbereitung und Begleitung bei der Erstellung eines Erfahrungsbericht gemäß §97  
670 Erneuerbare-Energien Gesetz. Teilvorhaben II e): Wind an Land, Technical Report, 2019.
- Demir N., Taskin A.: Life cycle assessment of wind turbines in Pinarbasi-Kayseri, *Journal of Cleaner Production*, 54, 253-263, [10.1016/j.jclepro.2013.04.016](https://doi.org/10.1016/j.jclepro.2013.04.016), 2013.
- Duffy A., Hand M., Wisser R., Lantz E., Dalla Riva A., Berkhout V., Stenkvist M., Weir D. and Lacal-Arántegui R.: Land-based wind energy cost trends in Germany, Denmark, Ireland, Norway, Sweden and the United States, *Applied Energy*, 277, 114777, [10.1016/j.apenergy.2020.114777](https://doi.org/10.1016/j.apenergy.2020.114777), 2020.
- 675 Enercon: E-115 EP-3, [produkte/ep-3/e-115-ep3/](https://www.enercon.com/produkte/ep-3/e-115-ep3/) (last access: 24 November 2021), 2021.
- Fingersh L., Hand M., Laxson A.: Wind Turbine Design Cost and Scaling Model, NREL Report NREL/TP-500-40566, <https://www.nrel.gov/docs/fy07osti/40566.pdf>, 2006.
- Gillingham K. and Stock J.H.: The Cost of Reducing Greenhouse Gas Emissions, *Journal of Economic Perspectives*, 32(4), 53-72, [doi.org/10.1257/jep.32.4.53](https://doi.org/10.1257/jep.32.4.53), 2018.
- 680 Guilloiré A., Canet H., Bottasso C.L.: Life-Cycle Environmental Impact of Wind Turbines: What are the Possible Improvement Pathways?, *J.Phys. Conf.Ser.*, ~~to appear, 2022.~~ [Volume 2265, doi.org/10.1088/1742-6596/2265/4/042033, 2022](https://doi.org/10.1088/1742-6596/2265/4/042033)
- Haapala K. and Prempreeda P.: Comparative life cycle assessment of 2.0 MW wind turbines, *Int. J. of Sustainable Manufacturing*, 3, 170-185, [10.1504/IJSM.2014.062496](https://doi.org/10.1504/IJSM.2014.062496), 2014.
- 685 Hauschild M.Z., Rosenbaum R.K. and Olsen S.I.: Life Cycle Assessment, Theory and Practice, Springer, [doi.org/10.1007/978-3-319-56475-3](https://doi.org/10.1007/978-3-319-56475-3), 2018.

- Hawkes A.D.: Estimating marginal CO<sub>2</sub> emissions rates for national electricity systems, *Energy Policy*, 38, 5977-5987, <https://doi.org/10.1016/j.enpol.2010.05.053>, 2014.
- Hill C. and Norton A.: LCA database of environmental impacts to inform material selection process, *Damage Controlled Composite Materials (DACOMAT) Deliverable 6.1*, 2018.
- 690 Hirth L.: Integration costs and the value of wind power. Thoughts on a valuation framework for variable renewable electricity sources, USAEE Working Paper, 12-150 [doi.org/10.2139/ssrn.2187632](https://doi.org/10.2139/ssrn.2187632), 2012.
- Hirth L. and Müller S.: System-friendly wind power: How advanced wind turbine design can increase the economic value of electricity generated through wind power, *Energy Economics*, 56, 51-63 [10.1016/j.eneco.2016.02.016](https://doi.org/10.1016/j.eneco.2016.02.016), 2016.
- 695 International Panel on Climate Change: *Climate Change 2007: Impacts, Adaptation and Vulnerability. Contribution of Working Group II to the Fourth Assessment Report of the Intergovernmental Panel on Climate Change*, M.L. Parry, O.F. Canziani, J.P. Palutikof, P.J. van der Linden and C.E. Hanson, Eds., Cambridge University Press, Cambridge, UK, 2007.
- International Renewable Energy Agency: *Renewable Power Generation Costs in 2020*, Abhu Dhabi, 2021.
- Jansen M., Staffell I., Kitzing L., Quoilin S., Wiggelinkhuizen E., Bulder B., Riepin I. and Müsgens F.: Offshore wind competitiveness in mature markets without subsidy, *Nature Energy*, 5, 614-622, <https://doi.org/10.1038/s41560-020-0661-2>, 2020.
- 700 Joskow P.: Comparing the costs of intermittent and dispatchable electricity generation technologies, *Am. Econ. Rev. Pap. Proc.*, 100 (3), 238-241, [10.1257/aer.101.3.238](https://doi.org/10.1257/aer.101.3.238), 2011.
- Kikstra J.S., Waidelich P., Rising J., Yumahev D., Hope C. and Brierley C.M.: The social cost of carbon dioxide under climate-economy feedbacks and temperature variability, *Environ. Res. Lett.*, 16, 094037, <https://doi.org/10.1088/1748-9326/ac1d0b>, 2021.
- 705 Koffi B., Cerutti A.K., Duerr M., Iancu A., Kona A. and Janssens-Maenhout G.: *Covenant of Mayors for Climate and Energy: Default emission factors for local emission inventories*, Technical Report EU 28718 EN, Publications Office of the European Union, Luxembourg, [10.2760/290197](https://doi.org/10.2760/290197), 2017.
- Lantz E., Wiser R. and Hand M.: *IEA Wind Task 26 - The Past and Future Cost of Wind Energy*, technical report NREL/TP-6A20-53510, NREL, Golden, CO, USA, <https://www.nrel.gov/docs/fy12osti/53510.pdf>, 2012.
- 710 Lantz, E., Dalla Riva A., Hethy J., Vitina A.: *Impacts of Wind Turbine Technology on the System Value of Wind in Europe*, technical report NREL/TP-6A20-70337, NREL, Golden, CO, USA, [nrel.gov/docs/fy18osti/70337.pdf](https://www.nrel.gov/docs/fy18osti/70337.pdf), 2017.
- Mai, T., Mowers, M. and Eurek, K.: *Competitiveness Metrics for Electricity System Technologies*, technical report NREL/TP-6A20-72549, NREL, Golden, CO, USA, <https://www.osti.gov/biblio/1765599>, 2021.
- MATLAB 2019a; Fmincon, The MathWorks, Inc., Natick, Massachusetts, United States, <https://www.mathworks.com/help/optim/ug/fmincon.html>,
- 715 2019.
- Myhre G., Shindell G., Breon F.-M., Collins W., Fuglestedt J., Huang F., Koch D., Lamarque J.-F., Lee D., Mendoza B., Nakajima T., Robock A., Stephens G., Takemura T. and Zhang H.: *Anthropogenic and Natural Radiative Forcing*, Cambridge University Press, book section 8, p. 659-740, 2013.
- National Academies of Sciences, Engineering and Medicine: *Valuing Climate Damages: Updating Estimation of the Social Cost of Carbon Dioxide*, The National Academies Press, Washington DC, <https://doi.org/10.17226/24651>, 2017.
- 720 New European Wind Atlas (NEWA): *Map Interface for the NEWA*, Mesoscale Data Download, [neweuropeanwindatlas.eu](http://neweuropeanwindatlas.eu), (last access: 24 November 2021), 2021.
- NREL: *WISDEM v3.2.0*, <https://github.com/WISDEM/WISDEM>, 2021.

- Ozoemena M., Cheung W., Hasan R.: Comparative LCA of technology improvement opportunities for a 1.5 MW wind turbine in the context of an onshore wind farm, *Clean Technologies and Environmental Policy*, 20, 173-190, 10.1007/s10098-017-1466-2, 2018.
- Pfaffel S., Faulstich S. and Rohrig K.: Performance and Reliability of Wind Turbines: A Review, *Energies*, 10, 1904, <https://doi.org/10.3390/en10111904>, 2017.
- Ramirez-Tejeda K., Turcotte D. and Pike S.: Unsustainable Wind Turbine Blade Disposal Practices in the United States: A Case for Policy Intervention and Technological Innovation. *New Solutions: A Journal of Environmental and Occupational Health Policy* 26, 4, 581-598, [doi.org/10.1177/1048291116676098](https://doi.org/10.1177/1048291116676098), 2017
- Ricke K., Drouet L., Caldeira K. and Tavoni M.: Country-level social cost of carbon, *Nature Clim. Change*, 8, 895-900, [doi.org/10.1038/s41558-018-0282-y](https://doi.org/10.1038/s41558-018-0282-y), 2018.
- Roser M.: Why did renewables become so cheap so fast?, *Our World in Data*, <https://ourworldindata.org/cheap-renewables-growth> (last access: 29 Dec. 2021), 2021.
- Rydh C., Jonsson M. and Lindahl P.: Replacement of Old Wind Turbines Assessed from Energy, Environmental and Economic Perspectives, Technical report NEI-SE-544, Kalmar, Sweden, <https://www.osti.gov/etdweb/biblio/20534695>, 2004.
- Schleisner L.: Life cycle assessment of a wind farm and related externalities, *Ren. Energy*, 20(3), 279-288, 10.1016/S0960-1481(99)00123-8, 2000.
- Schmid M., Gonzalez Ramon N., Direckx A. and Wegman T.: Accelerating Wind Turbine Blade Circularity, *Wind Europe Report*, <https://windeurope.org/intelligence-platform/product/accelerating-wind-turbine-blade-circularity/>, 2020.
- Seckinger N. and Radgen P.: Dynamic Prospective Average and Marginal GHG Emission Factors – Scenario-Based Method for the German Power System until 2050, *Energies*, 14, 2527, 10.3390/en14092527, 2021.
- Seshadri, Aravind: NSGA-II: A multi-objective optimization algorithm, *MATLAB Central File Exchange*, <https://www.mathworks.com/matlabcentral/fileexchange/10429-nsga-ii-a-multi-objective-optimization-algorithm>, last access: September 14, 2020.
- Silver-Evans K., Azevedo I.L. and Morgan M.G.: Marginal Emissions for the U.S. Electricity, *Environmental Science & Technology*, 46, 9, 4742-4748, [doi.org/10.1021/es300145v](https://doi.org/10.1021/es300145v), 2012.
- Simpson J., Loth E. and Dykes K.: Cost of Valued Energy for design of renewable energy systems, *Renewable Energy*, 153, 290-300, [doi.org/10.1016/j.renene.2020.01.131](https://doi.org/10.1016/j.renene.2020.01.131), 2020.
- Song Y., Youn J. and Gutowski T.: Life-cycle energy analysis of fiber-reinforced composites, *Composites Part A: Applied Science and Manufacturing*, 40, 1257-1265, 2009.
- Spielmann M., Bauer C., Dones R. and Tuchschnid M.: Transport Services in Ecoinvent, ecoinvent report No. 14, Swiss Center for Life Cycle Inventories, [https://db.ecoinvent.org/reports/14\\_transport.pdf](https://db.ecoinvent.org/reports/14_transport.pdf), 2007.
- Stehly T., Beiter P., Heimiller D. and Scott G.: 2017 Cost of Wind Energy Review, NREL Report NREL/TP-6A20-72167, Golden, CO, <https://www.nrel.gov/docs/fy18osti/72167.pdf>, 2018.
- Swisher P., Murcia Leon J.P., Gea Bermúdez J., Koivisto M.J., Madsen H.A., Münster M.: Competitiveness of a low specific power, low cut-out wind speed wind turbine in North and Central Europe towards 2050. *Applied Energy*, 306, 118043, <https://doi.org/10.1016/j.apenergy.2021.118043>, 2022.
- Swiss Center for Life Cycle Inventories: Ecoinvent version 3.6, <https://v36.ecoquery.ecoinvent.org> (last access: October 2020), 2020.
- Thomson R.C., Harrison G.P. and Chick J.P.: Marginal greenhouse gas emissions displacement of wind power in Great Britain, *Energy Policy*, 101, 201-210, 10.1016/j.enpol.2016.11.012, 2017.

- Tremeac B. and Meunier F.: Life cycle analysis of 4.5MW and 250W wind turbines, *Renewable and Sustainable Energy Reviews*, 13, 2104-2110./10.1016/j.rser.2009.01.001, 2009.
- Ueckerdt F., Hirth L., Luderer G., Edenhofer O.: System LCOE: What are the costs of variable renewables?, *Energy*, 63, 61-75, 765 10.1016/j.energy.2013.10.072., 2013.
- Veers P., Dykes K., Lantz E., Barth S., Bottasso C.L., Carlson O., Clifton A., Green J., Green,P., Holttinen H., Laird D., Lehtomäki V., Lundquist J.K., Manwell J., Marquis M., Meneveau C., Moriarty P., Munduate X., Muskulus M., Naughton J., Pao L., Paquette J., Peinke J., Robertson A., Sanz Rodrigo J., Sempreviva A.M., Smith J.C., Tuohy A., Wisser R.: Grand challenges in the science of wind energy, *Science*, 366(6464), 10.1126/science.aau2027, 2019.
- 770 Vestas: Life Cycle Assessment of Electricity Production from a V90-2.0 MW Gridstreamer Wind Plant, Technical report, Aahrus, Denmark, December 2011.
- Vestas: Life Cycle Assessment of Electricity Production from an onshore V100-2.6 MW Wind Plant, Technical report, Aahrus, Denmark, October 2013.
- Vestas: Life Cycle Assessment of Electricity Production from an onshore V90-3.0 MW Wind Plant, Technical report, Aahrus, Denmark, 775 October 2013.
- [WindEurope: Accelerating Wind Turbine Blade Circularity, May 2020.](#)
- Wisser R., Mills A., Seel J., Levin T. and Botterud A.: Impacts of Variable Renewable Energy on Bulk Power System Assets, Pricing and Costs, Technical report LBNL-2001082, Lawrence Berkeley National Laboratory, Berkeley, CA, USA, 2017.
- Wolf M.A., Pant R., Chomkham Sri K., Sala S., Pennington D.: The International Reference Life Cycle Data System (ILCD) Handbook - 780 Towards more sustainable production and consumption for a resource-efficient Europe, Technical report, Joint Research Center, European Commission, 2012.
